# Supplementary material for: “Integrative learning” promotes learning but not memory in older rats
Source: PeerJ. 2023 Mar 29;11:e15101. doi: 10.7717/peerj.15101 (PMC10066688; doi:10.7717/peerj.15101)
Supplement: Supplemental Information 4 [file peerj-11-15101-s004.xlsx]

## Sheet: Sheet1
No.	Experimental Infomation				Total area					Delicate behavior								first error area										second error area										third error area										first correct area
	Name of experiment	Name of subject	Experimental tracks	Date & Time of Experiments	Total distance (mm)	Total time (s)	Average velocity (mm/s)	Stationary time (s)	Freezing time (s)	Standing times	Latency to stand (s)	Stretching times	Latency to stretch (s)	Sniffing times	Latency to sniff (s)	Grooming times	Latency to groom (s)	Distance(mm)	Duration (s)	Average velocity (mm/s)	Entering times	Latency (s)	Stationary time (s)	Freezing time (s)	Head exploration times	Head exploration duration (s)	Latency to head exploration (s)	Distance (mm)	Duration (s)	Average velocity (mm/s)	Entering times	Latency (s)	Stationary time (s)	Freezing time (s)	Head exploration times	Head exploration duration (s)	Latency to head exploration (s)	Distance (mm)	Duration (s)	Average velocity (mm/s)	Entering times	Latency (s)	Stationary time (s)	Freezing time (s)	Head exploration times	Head exploration duration (s)	Latency to head exploration (s)	Distance (mm)	Duration (s)
1	IL Experiment - Elderly	IL-Animal 1	IL-Animal 1-1	2019/7/11 13:55:45	16895.96	304.48	55.49	150.47	24.50	0	304.48	0	304.51	0	304.48	0	304.48	1329.85	26.50	50.18	4	44.00	17.00	0.50	5	17.00	39.50	424.25	5.50	77.13	2	242.52	2.00	0.00	0	0.00	304.48	407.77	5.00	81.57	2	292.52	1.50	0.00	1	3.00	289.52	2295.72	56.01
2	IL Experiment - Elderly	IL-Animal 1	IL-Animal 1-2	2019/7/11 14:02:53	7417.68	10.97	676.38	5.00	1.00	0	10.97	0	11.00	0	10.97	0	10.97	7094.38	7.47	950.14	1	0.00	3.50	1.00	1	2.50	5.50	0.00	0.00	0.00	0	10.97	0.00	0.00	0	0.00	10.97	0.00	0.00	0.00	0	10.97	0.00	0.00	0	0.00	10.97	140.20	3.00
3	IL Experiment - Elderly	IL-Animal 1	IL-Animal 1-3	2019/7/11 14:03:09	8509.11	79.60	106.90	28.97	3.00	438	0.00	438	0.00	438	0.00	438	0.00	0.00	0.00	0.00	0	79.60	0.00	0.00	0	0.00	79.60	567.71	6.73	84.31	2	19.50	3.00	0.50	1	1.07	37.33	468.35	5.43	86.20	1	54.73	2.00	1.00	2	2.43	53.73	1327.75	12.00
4	IL Experiment - Elderly	IL-Animal 1	IL-Animal 1-4	2019/7/11 14:05:05	17100.13	83.47	204.88	29.50	7.50	231	0.00	231	0.00	231	0.00	231	0.00	1731.91	23.00	75.30	2	2.00	11.50	6.50	0	0.00	83.47	6109.44	8.50	718.77	2	34.00	3.50	0.00	1	1.50	38.50	0.00	0.00	0.00	0	83.47	0.00	0.00	1	3.00	60.00	1292.08	7.97
5	IL Experiment - Elderly	IL-Animal 1	IL-Animal 1-5	2019/7/11 14:07:03	18083.11	263.92	68.52	112.84	47.01	231	0.00	231	0.00	230	0.00	230	0.00	4727.16	50.37	93.85	6	10.00	14.93	17.00	7	18.57	8.50	528.46	7.00	75.48	1	214.75	3.50	0.50	2	2.50	212.75	930.07	10.50	88.56	1	232.75	5.00	1.50	2	1.50	232.25	4722.05	62.50
6	IL Experiment - Elderly	IL-Animal 1	IL-Animal 1-6	2019/7/11 14:13:22	21661.25	217.72	99.49	73.47	24.00	0	0.00	0	0.00	0	0.00	0	0.00	3190.45	43.37	73.57	6	2.50	18.00	3.50	8	20.57	1.00	323.56	4.63	69.82	1	132.17	3.00	0.50	0	0.00	217.72	2415.64	29.24	82.62	4	147.30	12.50	1.00	4	3.50	169.74	5233.56	62.23
7	IL Experiment - Elderly	IL-Animal 1	IL-Animal 1-7	2019/7/11 14:18:29	8259.62	67.93	121.59	23.00	1.50	231	0.00	231	0.00	230	0.00	230	0.00	238.92	1.27	188.62	1	10.63	0.50	0.00	1	2.00	3.00	432.29	6.00	72.05	2	25.43	3.00	0.00	0	0.00	67.93	853.06	8.03	106.19	1	48.90	3.00	1.50	0	0.00	67.93	1526.00	18.37
8	IL Experiment - Elderly	IL-Animal 1	IL-Animal 1-8	2019/7/11 14:20:07	7846.00	63.40	123.76	22.50	2.00	228	0.00	228	0.00	228	0.00	228	0.00	0.00	0.00	0.00	0	63.40	0.00	0.00	0	0.00	63.40	615.80	6.50	94.74	1	20.00	3.50	0.00	0	0.00	63.40	87.08	5.00	17.42	1	50.43	3.50	0.50	2	3.50	37.33	1590.36	8.93
9	IL Experiment - Elderly	IL-Animal 1	IL-Animal 1-9	2019/7/11 14:21:37	10030.55	80.73	124.24	24.00	4.50	231	0.00	231	0.00	230	0.00	230	0.00	1610.67	16.97	94.93	2	8.87	7.50	0.00	2	2.63	1.50	438.34	2.50	175.34	1	38.70	0.50	0.00	0	0.00	80.73	178.92	1.50	119.28	1	57.07	1.00	0.00	0	0.00	80.73	2333.92	13.90
10	IL Experiment - Elderly	IL-Animal 1	IL-Animal 1-10	2019/7/11 14:23:31	27087.10	191.48	141.46	158.48	0.00	236	0.00	236	0.00	236	0.00	235	0.00	14307.17	88.97	160.82	4	0.00	72.97	0.00	7	7.00	12.50	0.00	0.00	0.00	0	191.48	0.00	0.00	0	0.00	191.48	0.00	0.00	0.00	0	191.48	0.00	0.00	0	0.00	191.48	8224.94	16.00
11	IL Experiment - Elderly	IL-Animal 1	IL-Animal 1-11	2019/7/11 14:28:01	46459.06	127.97	363.06	81.97	0.00	228	0.00	228	0.00	228	0.00	228	0.00	5015.38	26.00	192.90	2	22.50	14.50	0.00	7	30.97	0.53	0.00	0.00	0.00	0	127.97	0.00	0.00	0	0.00	127.97	0.00	0.00	0.00	0	127.97	0.00	0.00	0	0.00	127.97	11052.94	32.97
12	IL Experiment - Elderly	IL-Animal 1	IL-Animal 1-12	2019/7/11 14:31:01	35782.88	58.97	606.84	34.00	0.00	231	0.00	231	0.00	230	0.00	230	0.00	3967.31	5.00	793.46	1	13.00	2.50	0.00	3	2.00	12.50	0.00	0.00	0.00	0	58.97	0.00	0.00	1	2.00	25.50	0.00	0.00	0.00	0	58.97	0.00	0.00	0	0.00	58.97	12470.43	23.97
13	IL Experiment - Elderly	IL-Animal 1	IL-Animal 1-13	2019/7/11 14:32:25	6772.81	42.87	158.00	7.00	1.50	0	0.00	0	0.00	0	0.00	0	0.00	0.00	0.00	0.00	0	42.87	0.00	0.00	0	0.00	42.87	0.00	0.00	0.00	0	42.87	0.00	0.00	1	2.00	12.70	0.00	0.00	0.00	0	42.87	0.00	0.00	1	1.23	29.80	1540.12	9.70
14	IL Experiment - Elderly	IL-Animal 1	IL-Animal 1-14	2019-07-16 16:19:23	7336.21	67.50	108.69	31.00	1.00	0	67.50	0	71.00	0	67.50	0	67.50	923.81	7.77	118.94	1	6.73	3.50	0.00	1	1.00	12.87	144.56	2.27	63.78	1	49.63	0.50	0.00	1	2.50	47.13	0.00	0.00	0.00	0	67.50	0.00	0.00	0	0.00	67.50	1282.95	24.03
15	IL Experiment - Elderly	IL-Animal 1	IL-Animal 1-15	2019/7/11 14:36:53	20421.01	156.14	130.79	45.00	8.00	231	0.00	231	0.00	230	0.00	230	0.00	1637.93	16.03	102.16	4	5.50	8.00	0.00	1	1.00	58.10	703.72	6.40	109.96	3	27.53	2.00	0.00	4	8.50	25.03	842.85	8.10	104.04	3	71.10	3.50	1.00	1	4.50	76.60	3495.76	17.97
16	IL Experiment - Elderly	IL-Animal 1	IL-Animal 1-16	2019/7/14 14:17:41	15217.90	128.34	118.58	37.57	1.00	468	0.00	468	0.00	468	0.00	468	0.00	382.23	7.50	50.95	1	143.10	3.67	0.00	1	0.50	148.20	535.77	20.57	26.05	1	96.73	15.00	1.00	0	0.00	128.34	1288.25	9.30	138.52	6	23.03	0.50	0.00	4	4.20	23.53	796.74	6.97
17	IL Experiment - Elderly	IL-Animal 1	IL-Animal 1-17	2019/7/14 14:27:33	3275.84	34.70	94.41	12.53	2.50	0	34.70	0	157.44	0	34.70	0	34.70	121.48	1.33	91.11	1	54.27	0.00	0.00	0	0.00	34.70	0.00	0.00	0.00	0	34.70	0.00	0.00	0	0.00	34.70	482.84	10.97	44.03	2	33.93	7.00	0.00	2	6.50	3.67	835.78	5.87
18	IL Experiment - Elderly	IL-Animal 1	IL-Animal 1-18	2019/7/14 14:31:21	14939.63	106.67	140.06	33.53	3.50	448	0.00	448	0.00	448	0.00	448	0.00	0.00	0.00	0.00	0	106.67	0.00	0.00	0	0.00	106.67	1069.23	9.90	108.00	3	13.70	2.50	0.00	0	0.00	106.67	1867.74	31.07	60.12	4	59.80	14.03	3.50	3	2.73	59.07	1881.95	10.30
19	IL Experiment - Elderly	IL-Animal 2	IL-Animal 2-1	2019/7/11 14:56:21	19648.42	596.41	32.94	376.97	146.98	227	0.00	227	0.00	227	0.00	227	0.00	439.30	6.50	67.59	2	114.00	3.00	0.00	2	23.50	194.01	0.00	0.00	0.00	0	596.41	0.00	0.00	0	0.00	596.41	0.00	0.00	0.00	0	596.41	0.00	0.00	0	0.00	596.41	93.83	2.50
20	IL Experiment - Elderly	IL-Animal 2	IL-Animal 2-2	2019/7/11 15:10:21	8511.99	7.97	1068.45	2.47	0.50	231	0.00	231	0.00	230	0.00	230	0.00	0.00	0.00	0.00	0	7.97	0.00	0.00	0	0.00	7.97	0.00	0.00	0.00	0	7.97	0.00	0.00	0	0.00	7.97	0.00	0.00	0.00	0	7.97	0.00	0.00	0	0.00	7.97	5182.45	6.00
21	IL Experiment - Elderly	IL-Animal 2	IL-Animal 2-3	2019/7/11 15:10:33	10875.66	124.13	87.61	59.50	13.47	442	0.00	442	0.00	441	0.00	441	0.00	0.00	0.00	0.00	0	124.13	0.00	0.00	1	4.50	7.00	671.62	15.00	44.78	1	58.00	11.00	0.50	2	3.50	55.50	91.85	5.00	18.37	1	92.17	1.50	2.50	1	2.00	90.17	3145.30	32.50
22	IL Experiment - Elderly	IL-Animal 2	IL-Animal 2-4	2019/7/11 15:13:29	23521.43	123.47	190.51	54.47	13.50	329	0.00	329	0.00	329	0.00	329	0.00	1952.97	12.00	162.75	3	4.50	5.50	2.00	2	4.50	19.00	0.00	0.00	0.00	0	123.47	0.00	0.00	0	0.00	123.47	0.00	0.00	0.00	0	123.47	0.00	0.00	1	1.00	100.00	8255.86	51.97
23	IL Experiment - Elderly	IL-Animal 2	IL-Animal 2-5	2019/7/11 15:16:24	75035.54	391.96	191.44	173.46	27.00	240	0.00	240	0.00	240	0.00	240	0.00	14996.78	83.50	179.61	11	8.50	50.50	8.00	7	9.50	7.50	2208.97	2.50	883.40	1	233.02	1.00	0.00	2	1.00	234.52	1485.67	13.50	110.03	2	175.51	6.00	2.50	3	2.50	175.01	16528.13	95.46
24	IL Experiment - Elderly	IL-Animal 2	IL-Animal 2-6	2019/7/11 15:25:36	12758.73	133.47	95.60	69.00	14.00	242	0.00	242	0.00	242	0.00	242	0.00	549.01	24.00	22.88	1	33.50	16.50	3.50	1	1.00	32.50	0.00	0.00	0.00	0	133.47	0.00	0.00	0	0.00	133.47	99.73	5.00	19.95	1	106.50	3.50	0.50	0	0.00	133.47	4477.51	23.50
25	IL Experiment - Elderly	IL-Animal 2	IL-Animal 2-7	2019/7/11 15:28:45	8452.67	84.53	99.99	32.47	2.00	232	0.00	232	0.00	232	0.00	232	0.00	641.67	15.03	42.68	3	4.50	10.50	1.00	0	0.00	84.53	100.78	1.50	67.19	1	58.53	0.50	0.00	2	5.00	47.73	0.00	0.00	0.00	0	84.53	0.00	0.00	0	0.00	84.53	1996.89	21.40
26	IL Experiment - Elderly	IL-Animal 2	IL-Animal 2-8	2019/7/11 15:30:44	6569.71	42.10	156.05	13.00	0.00	228	0.00	228	0.00	228	0.00	228	0.00	136.24	3.00	45.41	1	5.20	2.00	0.00	0	0.00	42.10	0.00	0.00	0.00	0	42.10	0.00	0.00	0	0.00	42.10	0.00	0.00	0.00	0	42.10	0.00	0.00	0	0.00	42.10	1752.76	12.70
27	IL Experiment - Elderly	IL-Animal 2	IL-Animal 2-9	2019/7/11 15:31:45	6178.08	35.67	173.22	10.47	0.00	237	0.00	237	0.00	237	0.00	237	0.00	0.00	0.00	0.00	0	35.67	0.00	0.00	1	2.00	3.73	0.00	0.00	0.00	0	35.67	0.00	0.00	0	0.00	35.67	0.00	0.00	0.00	0	35.67	0.00	0.00	0	0.00	35.67	1574.58	8.30
28	IL Experiment - Elderly	IL-Animal 2	IL-Animal 2-10	2019/7/11 15:32:36	1927.69	131.97	14.61	125.97	0.00	229	0.00	229	0.00	229	0.00	229	0.00	0.00	0.00	0.00	0	131.97	0.00	0.00	0	0.00	131.97	0.00	0.00	0.00	0	131.97	0.00	0.00	0	0.00	131.97	0.00	0.00	0.00	0	131.97	0.00	0.00	0	0.00	131.97	1927.69	131.97
29	IL Experiment - Elderly	IL-Animal 2	IL-Animal 2-11	2019/7/11 15:35:43	696.93	334.47	2.08	332.47	0.00	234	0.00	234	0.00	234	0.00	234	0.00	0.00	0.00	0.00	0	334.47	0.00	0.00	0	0.00	334.47	0.00	0.00	0.00	0	334.47	0.00	0.00	0	0.00	334.47	0.00	0.00	0.00	0	334.47	0.00	0.00	0	0.00	334.47	696.93	334.47
30	IL Experiment - Elderly	IL-Animal 2	IL-Animal 2-12	2019/7/11 15:43:34	965.34	198.48	4.86	196.48	0.00	235	0.00	236	0.00	235	0.00	235	0.00	0.00	0.00	0.00	0	198.48	0.00	0.00	0	0.00	198.48	0.00	0.00	0.00	0	198.48	0.00	0.00	0	0.00	198.48	0.00	0.00	0.00	0	198.48	0.00	0.00	0	0.00	198.48	965.34	198.48
31	IL Experiment - Elderly	IL-Animal 2	IL-Animal 2-13	2019/7/11 15:48:14	17205.45	208.98	82.33	103.97	7.00	231	0.00	231	0.00	231	0.00	231	0.00	638.87	19.50	32.76	4	35.00	12.50	1.50	1	1.50	33.50	0.00	0.00	0.00	0	208.98	0.00	0.00	3	6.00	124.07	435.73	6.00	72.61	3	143.03	2.50	0.00	6	4.00	142.53	5802.85	67.07
32	IL Experiment - Elderly	IL-Animal 2	IL-Animal 2-14	2019-07-16 16:21:09	17739.86	181.34	97.82	72.40	1.00	0	181.34	0	185.48	0	181.34	0	181.34	1238.95	22.64	54.74	6	7.27	13.00	0.50	8	18.57	21.50	0.00	0.00	0.00	0	181.34	0.00	0.00	2	6.00	144.30	0.00	0.00	0.00	0	181.34	0.00	0.00	1	0.50	8.90	7548.31	75.57
33	IL Experiment - Elderly	IL-Animal 2	IL-Animal 2-15	2019/7/11 15:57:33	6097.10	84.67	72.01	37.47	13.50	256	0.00	256	0.00	256	0.00	256	0.00	95.80	6.00	15.97	1	34.00	5.00	0.00	1	2.00	32.00	0.00	0.00	0.00	0	84.67	0.00	0.00	0	0.00	84.67	0.00	0.00	0.00	0	84.67	0.00	0.00	0	0.00	84.67	1337.87	37.50
34	IL Experiment - Elderly	IL-Animal 2	IL-Animal 2-16	2019/7/14 14:36:01	11861.20	170.98	69.37	90.04	4.00	464	0.00	464	0.00	464	0.00	464	0.00	0.00	0.00	0.00	0	170.98	0.00	0.00	1	1.63	176.04	0.00	0.00	0.00	0	170.98	0.00	0.00	0	0.00	170.98	670.77	36.00	18.63	4	28.53	27.00	2.50	1	4.00	121.10	2233.17	12.10
35	IL Experiment - Elderly	IL-Animal 2	IL-Animal 2-17	2019/7/14 14:43:29	8187.25	69.33	118.09	21.17	2.50	452	0.00	452	0.00	452	0.00	452	0.00	166.51	1.97	84.67	1	62.23	0.00	0.00	0	0.00	69.33	0.00	0.00	0.00	0	69.33	0.00	0.00	1	1.00	49.17	169.38	2.13	79.40	2	19.17	0.50	0.00	5	8.33	14.67	1867.73	18.63
36	IL Experiment - Elderly	IL-Animal 2	IL-Animal 2-18	2019/7/14 14:45:50	19894.63	267.08	74.49	157.01	0.00	438	0.00	438	0.00	438	0.00	438	0.00	0.00	0.00	0.00	0	267.08	0.00	0.00	0	0.00	267.08	0.00	0.00	0.00	0	267.08	0.00	0.00	0	0.00	267.08	751.08	45.00	16.69	5	46.93	37.50	0.00	6	8.00	45.93	1581.88	5.07
37	IL Experiment - Elderly	IL-Animal 3	IL-Animal 3-1	2019/7/11 16:18:02	53892.59	593.91	90.74	373.93	65.49	232	0.00	232	0.00	232	0.00	232	0.00	21783.41	111.99	194.52	8	81.50	72.99	20.00	12	63.49	22.50	3427.66	19.00	180.38	5	199.01	10.00	0.00	11	11.00	198.51	0.00	0.00	0.00	0	593.91	0.00	0.00	0	0.00	593.91	14408.77	226.98
38	IL Experiment - Elderly	IL-Animal 3	IL-Animal 3-2	2019/7/11 16:31:59	20691.69	315.81	65.52	155.97	32.00	237	0.00	237	0.00	237	0.00	237	0.00	3812.84	53.13	71.76	5	17.67	28.50	6.00	6	11.50	15.67	614.89	9.94	61.89	3	173.84	3.50	2.50	3	5.00	173.34	941.99	15.00	62.81	3	257.13	8.00	0.00	1	2.50	240.12	5700.79	100.71
39	IL Experiment - Elderly	IL-Animal 3	IL-Animal 3-3	2019/7/11 16:39:32	11826.45	55.97	211.31	13.50	0.50	250	0.00	250	0.00	250	0.00	250	0.00	138.78	1.00	138.78	1	11.00	0.00	0.00	1	0.50	10.50	0.00	0.00	0.00	0	55.97	0.00	0.00	1	2.50	26.00	0.00	0.00	0.00	0	55.97	0.00	0.00	0	0.00	55.97	1418.93	11.47
40	IL Experiment - Elderly	IL-Animal 3	IL-Animal 3-4	2019/7/11 16:40:52	24605.79	83.97	293.05	25.00	8.50	252	0.00	252	0.00	251	0.00	251	0.00	521.30	10.00	52.13	3	1.50	4.00	2.00	3	3.00	1.00	7580.96	17.50	433.20	2	20.50	8.50	3.00	1	1.00	19.50	119.67	2.00	59.84	1	54.50	0.50	0.50	1	1.00	53.50	2372.86	4.97
41	IL Experiment - Elderly	IL-Animal 3	IL-Animal 3-5	2019/7/11 16:42:52	9813.14	77.97	125.86	30.00	3.00	228	0.00	228	0.00	228	0.00	228	0.00	54.79	1.00	54.79	1	15.00	0.50	0.00	1	2.50	7.50	118.82	3.00	39.61	1	22.50	2.00	0.00	0	0.00	77.97	222.78	9.50	23.45	1	40.00	6.00	1.50	1	2.50	61.00	2650.05	12.97
42	IL Experiment - Elderly	IL-Animal 3	IL-Animal 3-6	2019/7/11 16:44:43	37045.11	69.97	529.47	15.50	9.00	234	0.00	234	0.00	234	0.00	234	0.00	0.00	0.00	0.00	0	69.97	0.00	0.00	2	2.00	12.83	0.00	0.00	0.00	0	69.97	0.00	0.00	1	2.00	30.83	48.89	0.50	97.78	1	58.83	0.00	0.00	3	6.50	41.33	9544.68	17.47
43	IL Experiment - Elderly	IL-Animal 3	IL-Animal 3-7	2019/7/11 16:46:23	7454.26	69.43	107.36	22.50	3.00	242	0.00	242	0.00	242	0.00	242	0.00	0.00	0.00	0.00	0	69.43	0.00	0.00	0	0.00	69.43	0.00	0.00	0.00	0	69.43	0.00	0.00	1	3.00	21.53	241.24	3.50	68.93	2	39.73	1.50	0.00	1	1.00	64.97	1875.34	15.50
44	IL Experiment - Elderly	IL-Animal 3	IL-Animal 3-8	2019/7/11 16:48:02	7234.83	63.50	113.94	28.97	0.00	248	0.00	248	0.00	248	0.00	248	0.00	0.00	0.00	0.00	0	63.50	0.00	0.00	0	0.00	63.50	0.00	0.00	0.00	0	63.50	0.00	0.00	0	0.00	63.50	261.78	5.13	51.00	1	49.73	3.00	0.00	1	2.00	47.73	1649.20	9.20
45	IL Experiment - Elderly	IL-Animal 3	IL-Animal 3-9	2019/7/11 16:49:35	6342.96	26.87	236.09	4.47	0.00	253	0.00	253	0.00	253	0.00	253	0.00	0.00	0.00	0.00	0	26.87	0.00	0.00	0	0.00	26.87	0.00	0.00	0.00	0	26.87	0.00	0.00	0	0.00	26.87	0.00	0.00	0.00	0	26.87	0.00	0.00	0	0.00	26.87	1319.73	3.27
46	IL Experiment - Elderly	IL-Animal 3	IL-Animal 3-10	2019/7/11 16:58:00	19966.87	45.47	439.16	10.00	5.50	234	0.00	234	0.00	234	0.00	234	0.00	0.00	0.00	0.00	0	45.47	0.00	0.00	1	4.50	16.50	0.00	0.00	0.00	0	45.47	0.00	0.00	0	0.00	45.47	0.00	0.00	0.00	0	45.47	0.00	0.00	0	0.00	45.47	3588.07	20.97
47	IL Experiment - Elderly	IL-Animal 3	IL-Animal 3-11	2019/7/11 16:59:06	2915.86	6.97	418.55	2.50	0.00	255	0.00	255	0.00	255	0.00	255	0.00	0.00	0.00	0.00	0	6.97	0.00	0.00	0	0.00	6.97	0.00	0.00	0.00	0	6.97	0.00	0.00	0	0.00	6.97	0.00	0.00	0.00	0	6.97	0.00	0.00	0	0.00	6.97	1908.80	3.00
48	IL Experiment - Elderly	IL-Animal 3	IL-Animal 3-12	2019/7/11 16:59:17	13098.33	19.97	656.01	1.00	0.50	229	0.00	229	0.00	229	0.00	229	0.00	0.00	0.00	0.00	0	19.97	0.00	0.00	0	0.00	19.97	0.00	0.00	0.00	0	19.97	0.00	0.00	0	0.00	19.97	0.00	0.00	0.00	0	19.97	0.00	0.00	1	0.50	10.50	1056.23	2.50
49	IL Experiment - Elderly	IL-Animal 3	IL-Animal 3-13	2019/7/11 16:59:47	14253.73	143.27	99.49	52.00	7.00	231	0.00	231	0.00	231	0.00	231	0.00	875.04	9.50	92.11	4	9.50	3.00	0.50	2	1.50	9.00	346.74	7.00	49.54	3	38.00	4.00	0.00	3	4.00	47.00	0.00	0.00	0.00	0	143.27	0.00	0.00	0	0.00	143.27	5238.28	63.90
50	IL Experiment - Elderly	IL-Animal 3	IL-Animal 3-14	2019-07-16 16:25:38	6104.21	20.83	293.00	0.00	0.00	0	20.83	0	20.87	0	20.83	0	20.83	0.00	0.00	0.00	0	20.83	0.00	0.00	0	0.00	20.83	204.74	1.47	139.59	1	11.43	0.00	0.00	2	1.00	10.93	0.00	0.00	0.00	0	20.83	0.00	0.00	0	0.00	20.83	1396.27	4.20
51	IL Experiment - Elderly	IL-Animal 3	IL-Animal 3-15	2019/7/11 17:03:42	9862.46	54.27	181.74	7.00	0.50	235	0.00	236	0.00	235	0.00	235	0.00	341.57	2.50	136.63	2	8.07	0.00	0.00	1	1.00	19.27	0.00	0.00	0.00	0	54.27	0.00	0.00	0	0.00	54.27	0.00	0.00	0.00	0	54.27	0.00	0.00	0	0.00	54.27	3868.61	18.73
52	IL Experiment - Elderly	IL-Animal 3	IL-Animal 3-16	2019/7/14 14:53:49	22617.35	219.59	103.00	88.94	1.00	470	0.00	470	0.00	470	0.00	470	0.00	0.00	0.00	0.00	0	219.59	0.00	0.00	3	4.70	180.24	414.02	3.50	118.28	2	33.20	0.00	0.00	3	4.10	222.22	3454.01	81.31	42.48	12	13.90	52.74	0.50	9	13.77	29.10	2424.15	13.47
53	IL Experiment - Elderly	IL-Animal 3	IL-Animal 3-17	2019/7/14 14:59:47	34867.42	198.98	175.23	38.80	3.00	500	0.00	500	0.00	500	0.00	500	0.00	734.94	4.23	173.57	2	151.17	0.00	0.00	1	2.33	201.18	317.70	5.80	54.76	2	158.27	3.67	0.00	2	1.50	76.67	3015.83	26.10	115.55	9	3.67	9.50	0.50	6	10.77	20.67	2847.54	15.27
54	IL Experiment - Elderly	IL-Animal 3	IL-Animal 3-18	2019/7/14 15:06:28	6008.62	29.50	203.68	5.00	0.00	490	0.00	490	0.00	490	0.00	490	0.00	0.00	0.00	0.00	0	29.50	0.00	0.00	0	0.00	29.50	0.00	0.00	0.00	0	29.50	0.00	0.00	0	0.00	29.50	0.00	0.00	0.00	0	29.50	0.00	0.00	1	0.63	10.23	1540.78	6.60
55	IL Experiment - Elderly	IL-Animal 4	IL-Animal 4-1	2019/7/11 17:22:12	12626.96	253.49	49.81	142.48	8.50	244	0.00	244	0.00	243	0.00	243	0.00	1506.59	31.50	47.82	5	31.50	18.00	0.00	6	14.50	6.50	0.00	0.00	0.00	0	253.49	0.00	0.00	0	0.00	253.49	365.01	4.50	81.10	2	231.02	2.00	0.00	3	1.50	229.02	5503.00	126.48
56	IL Experiment - Elderly	IL-Animal 4	IL-Animal 4-2	2019/7/11 17:28:10	19049.60	329.47	57.82	168.01	12.00	239	0.00	239	0.00	239	0.00	239	0.00	2548.91	37.50	67.97	9	4.50	19.00	0.00	7	9.50	40.50	330.20	2.00	165.14	1	262.52	0.50	0.00	1	3.00	166.51	0.00	0.00	0.00	0	329.47	0.00	0.00	0	0.00	329.47	5398.50	94.97
57	IL Experiment - Elderly	IL-Animal 4	IL-Animal 4-3	2019/7/11 17:35:56	12344.56	189.78	65.05	93.50	7.50	240	0.00	240	0.00	240	0.00	240	0.00	1211.90	21.50	56.37	5	43.50	12.50	0.00	9	15.00	4.00	280.52	7.00	40.08	2	79.67	4.50	0.00	2	2.50	78.67	0.00	0.00	0.00	0	189.78	0.00	0.00	1	1.00	175.81	4392.25	90.47
58	IL Experiment - Elderly	IL-Animal 4	IL-Animal 4-4	2019/7/11 17:40:24	21664.94	90.47	239.48	30.00	2.00	245	0.00	245	0.00	245	0.00	245	0.00	835.67	9.00	92.85	6	9.00	2.50	0.00	2	2.00	7.50	4136.33	9.00	459.60	2	56.00	3.00	1.50	1	2.00	54.00	0.00	0.00	0.00	0	90.47	0.00	0.00	0	0.00	90.47	4879.22	22.97
59	IL Experiment - Elderly	IL-Animal 4	IL-Animal 4-5	2019/7/11 17:42:33	6133.59	61.67	99.46	21.50	2.50	247	0.00	247	0.00	247	0.00	247	0.00	936.26	12.50	74.90	4	10.00	4.50	0.50	3	3.00	8.50	0.00	0.00	0.00	0	61.67	0.00	0.00	0	0.00	61.67	0.00	0.00	0.00	0	61.67	0.00	0.00	0	0.00	61.67	2745.02	25.67
60	IL Experiment - Elderly	IL-Animal 4	IL-Animal 4-6	2019/7/11 17:44:02	6345.24	141.20	44.94	68.00	24.00	245	0.00	245	0.00	245	0.00	245	0.00	1120.89	24.50	45.75	3	61.00	15.00	0.00	6	11.50	27.00	0.00	0.00	0.00	0	141.20	0.00	0.00	0	0.00	141.20	0.00	0.00	0.00	0	141.20	0.00	0.00	0	0.00	141.20	1780.76	59.50
61	IL Experiment - Elderly	IL-Animal 4	IL-Animal 4-7	2019/7/11 17:47:22	7561.20	66.87	113.08	25.00	1.50	242	0.00	242	0.00	242	0.00	242	0.00	0.00	0.00	0.00	0	66.87	0.00	0.00	0	0.00	66.87	0.00	0.00	0.00	0	66.87	0.00	0.00	2	4.00	15.43	490.05	3.00	163.35	1	53.90	0.50	0.00	0	0.00	66.87	1492.98	12.70
62	IL Experiment - Elderly	IL-Animal 4	IL-Animal 4-8	2019/7/11 17:49:05	7352.07	74.47	98.73	30.00	2.50	253	0.00	253	0.00	253	0.00	253	0.00	173.64	1.50	115.76	1	33.80	0.00	0.00	1	0.50	11.27	0.00	0.00	0.00	0	74.47	0.00	0.00	0	0.00	74.47	0.00	0.00	0.00	0	74.47	0.00	0.00	0	0.00	74.47	3903.18	33.27
63	IL Experiment - Elderly	IL-Animal 4	IL-Animal 4-9	2019/7/11 17:50:51	6017.99	56.27	106.96	22.50	0.97	244	0.00	244	0.00	243	0.00	243	0.00	393.86	11.00	35.81	2	6.00	8.00	0.00	0	0.00	56.27	0.00	0.00	0.00	0	56.27	0.00	0.00	1	3.50	26.00	0.00	0.00	0.00	0	56.27	0.00	0.00	0	0.00	56.27	2881.25	15.27
64	IL Experiment - Elderly	IL-Animal 4	IL-Animal 4-10	2019/7/11 17:52:12	11386.69	86.90	131.03	26.50	1.00	255	0.00	255	0.00	255	0.00	255	0.00	234.23	1.50	156.15	2	10.00	0.00	0.00	3	2.50	1.50	1329.74	11.00	120.89	2	34.70	2.50	0.00	2	7.50	20.87	206.38	4.00	51.60	1	66.40	2.00	1.00	0	0.00	86.90	1915.24	11.97
65	IL Experiment - Elderly	IL-Animal 4	IL-Animal 4-11	2019/7/11 17:54:17	5830.71	53.40	109.19	21.50	2.00	252	0.00	252	0.00	251	0.00	251	0.00	546.32	12.00	45.53	4	2.00	8.00	0.00	0	0.00	53.40	0.00	0.00	0.00	0	53.40	0.00	0.00	0	0.00	53.40	0.00	0.00	0.00	0	53.40	0.00	0.00	0	0.00	53.40	2926.25	14.17
66	IL Experiment - Elderly	IL-Animal 4	IL-Animal 4-12	2019/7/11 17:55:34	11428.83	143.20	79.81	63.50	9.50	247	0.00	247	0.00	247	0.00	247	0.00	578.06	12.00	48.17	2	45.77	7.00	0.50	4	7.00	1.00	120.80	1.00	120.80	1	28.50	0.00	0.00	1	2.00	34.10	274.87	5.50	49.98	1	122.87	3.50	0.00	1	1.00	121.87	5010.24	79.07
67	IL Experiment - Elderly	IL-Animal 4	IL-Animal 4-13	2019/7/11 17:58:57	6314.14	56.23	112.29	18.50	2.00	256	0.00	256	0.00	256	0.00	256	0.00	224.99	5.00	45.00	2	4.00	2.50	0.00	2	8.67	1.00	0.00	0.00	0.00	0	56.23	0.00	0.00	1	2.00	30.60	0.00	0.00	0.00	0	56.23	0.00	0.00	0	0.00	56.23	3235.81	25.63
68	IL Experiment - Elderly	IL-Animal 4	IL-Animal 4-14	2019-07-16 16:26:14	24030.80	254.33	94.49	115.51	1.50	0	254.33	0	256.49	0	254.33	0	254.33	616.85	14.00	44.06	5	1.50	9.00	0.00	18	36.84	0.53	747.82	10.50	71.21	3	55.10	4.00	0.50	2	2.50	73.03	142.99	1.00	142.96	1	247.52	0.00	0.00	2	2.00	70.03	8532.93	133.88
69	IL Experiment - Elderly	IL-Animal 4	IL-Animal 4-15	2019/7/11 18:08:40	7343.99	59.40	123.64	20.50	0.00	250	0.00	250	0.00	250	0.00	250	0.00	101.74	1.00	101.73	1	11.50	0.00	0.00	4	7.50	11.00	134.27	1.00	134.27	1	24.77	0.00	0.00	1	1.00	23.77	0.00	0.00	0.00	0	59.40	0.00	0.00	0	0.00	59.40	4048.87	34.17
70	IL Experiment - Elderly	IL-Animal 4	IL-Animal 4-16	2019/7/14 15:11:17	21745.69	185.25	117.39	57.64	0.50	478	0.00	478	0.00	478	0.00	478	0.00	483.15	4.80	100.64	2	116.33	1.50	0.00	7	10.50	112.33	0.00	0.00	0.00	0	185.25	0.00	0.00	2	2.00	144.74	2933.61	46.80	62.68	9	2.27	22.50	0.50	9	18.47	15.07	6959.92	52.71
71	IL Experiment - Elderly	IL-Animal 4	IL-Animal 4-17	2019/7/14 15:17:33	14292.33	131.27	108.88	44.47	0.00	472	0.00	472	0.00	472	0.00	472	0.00	0.00	0.00	0.00	0	131.27	0.00	0.00	1	0.73	131.43	0.00	0.00	0.00	0	131.27	0.00	0.00	0	0.00	131.27	2310.64	37.50	61.62	6	3.20	18.50	0.00	5	8.00	30.80	2244.04	15.80
72	IL Experiment - Elderly	IL-Animal 4	IL-Animal 4-18	2019/7/14 15:21:52	10030.32	87.20	115.03	32.50	0.00	474	0.00	474	0.00	474	0.00	474	0.00	216.26	1.50	144.17	1	113.60	0.00	0.00	0	0.00	87.20	0.00	0.00	0.00	0	87.20	0.00	0.00	0	0.00	87.20	0.00	0.00	0.00	0	87.20	0.00	0.00	2	6.50	15.70	2388.58	12.03
73	IL Experiment - Elderly	IL-Animal 5	IL-Animal 5-1	2019/7/11 18:26:23	13560.78	223.39	60.71	123.51	5.50	248	0.00	248	0.00	248	0.00	248	0.00	1255.59	59.50	21.10	5	4.50	47.50	0.50	4	4.50	3.50	1414.52	31.50	44.90	4	90.30	20.50	2.50	3	9.00	84.30	0.00	0.00	0.00	0	223.39	0.00	0.00	0	0.00	223.39	3174.90	35.80
74	IL Experiment - Elderly	IL-Animal 5	IL-Animal 5-2	2019/7/11 18:31:39	9588.24	177.51	54.02	99.50	6.50	240	0.00	240	0.00	240	0.00	240	0.00	762.89	19.00	40.15	4	12.20	13.00	0.50	4	7.50	8.70	230.72	3.00	76.91	1	113.03	1.00	0.00	1	1.50	111.53	0.00	0.00	0.00	0	177.51	0.00	0.00	0	0.00	177.51	3848.47	76.50
75	IL Experiment - Elderly	IL-Animal 5	IL-Animal 5-3	2019/7/11 18:35:51	6579.99	78.20	84.14	29.00	11.50	228	0.00	228	0.00	228	0.00	228	0.00	0.00	0.00	0.00	0	78.20	0.00	0.00	2	2.00	5.00	284.08	4.00	71.02	3	34.60	1.00	0.50	1	3.00	31.60	0.00	0.00	0.00	0	78.20	0.00	0.00	0	0.00	78.20	1518.03	24.63
76	IL Experiment - Elderly	IL-Animal 5	IL-Animal 5-4	2019/7/11 18:37:45	8615.68	83.50	103.18	24.67	22.00	232	0.00	232	0.00	232	0.00	232	0.00	1115.50	12.37	90.20	3	4.93	6.50	0.00	1	0.50	15.83	44.94	1.50	29.96	1	32.90	1.00	0.00	1	1.00	31.90	0.00	0.00	0.00	0	83.50	0.00	0.00	0	0.00	83.50	2585.13	11.50
77	IL Experiment - Elderly	IL-Animal 5	IL-Animal 5-5	2019/7/11 18:39:48	5966.82	38.20	156.20	10.00	2.00	229	0.00	229	0.00	229	0.00	229	0.00	0.00	0.00	0.00	0	38.20	0.00	0.00	1	2.50	6.80	106.99	4.00	26.75	1	17.63	3.50	0.00	0	0.00	38.20	0.00	0.00	0.00	0	38.20	0.00	0.00	0	0.00	38.20	1257.69	12.77
78	IL Experiment - Elderly	IL-Animal 5	IL-Animal 5-6	2019/7/11 18:40:47	6443.30	21.80	295.56	0.00	0.00	235	0.00	236	0.00	235	0.00	235	0.00	0.00	0.00	0.00	0	21.80	0.00	0.00	0	0.00	21.80	276.19	1.50	184.12	1	7.27	0.00	0.00	0	0.00	21.80	0.00	0.00	0.00	0	21.80	0.00	0.00	0	0.00	21.80	1262.28	3.60
79	IL Experiment - Elderly	IL-Animal 5	IL-Animal 5-7	2019/7/11 18:41:20	6300.16	26.33	239.25	1.00	0.00	231	0.00	231	0.00	231	0.00	231	0.00	0.00	0.00	0.00	0	26.33	0.00	0.00	0	0.00	26.33	579.41	2.93	197.52	1	8.53	0.50	0.00	0	0.00	26.33	0.00	0.00	0.00	0	26.33	0.00	0.00	0	0.00	26.33	1326.82	4.60
80	IL Experiment - Elderly	IL-Animal 5	IL-Animal 5-8	2019/7/11 18:42:00	5814.39	15.53	374.31	0.50	0.00	234	0.00	234	0.00	234	0.00	234	0.00	0.00	0.00	0.00	0	15.53	0.00	0.00	0	0.00	15.53	279.76	1.50	186.51	1	4.77	0.00	0.00	0	0.00	15.53	0.00	0.00	0.00	0	15.53	0.00	0.00	0	0.00	15.53	1245.18	2.67
81	IL Experiment - Elderly	IL-Animal 5	IL-Animal 5-9	2019/7/11 18:42:24	5883.65	34.77	169.23	5.50	14.50	237	0.00	237	0.00	237	0.00	237	0.00	0.00	0.00	0.00	0	34.77	0.00	0.00	0	0.00	34.77	189.89	1.00	189.89	1	5.10	0.00	0.00	0	0.00	34.77	0.00	0.00	0.00	0	34.77	0.00	0.00	0	0.00	34.77	992.38	2.07
82	IL Experiment - Elderly	IL-Animal 5	IL-Animal 5-10	2019/7/11 18:43:19	5705.90	17.53	325.43	1.00	0.00	239	0.00	239	0.00	239	0.00	239	0.00	0.00	0.00	0.00	0	17.53	0.00	0.00	0	0.00	17.53	425.51	1.30	327.31	1	5.27	0.00	0.00	0	0.00	17.53	0.00	0.00	0.00	0	17.53	0.00	0.00	0	0.00	17.53	1124.73	2.93
83	IL Experiment - Elderly	IL-Animal 5	IL-Animal 5-11	2019/7/11 18:43:46	5511.92	14.27	386.35	0.00	0.00	229	0.00	229	0.00	229	0.00	229	0.00	0.00	0.00	0.00	0	14.27	0.00	0.00	0	0.00	14.27	326.76	1.03	316.22	1	5.00	0.00	0.00	0	0.00	14.27	0.00	0.00	0.00	0	14.27	0.00	0.00	0	0.00	14.27	1199.07	2.97
84	IL Experiment - Elderly	IL-Animal 5	IL-Animal 5-12	2019/7/11 18:44:09	5452.80	15.93	342.22	0.50	0.00	253	0.00	253	0.00	253	0.00	253	0.00	0.00	0.00	0.00	0	15.93	0.00	0.00	0	0.00	15.93	0.00	0.00	0.00	0	15.93	0.00	0.00	0	0.00	15.93	0.00	0.00	0.00	0	15.93	0.00	0.00	0	0.00	15.93	1238.06	4.03
85	IL Experiment - Elderly	IL-Animal 5	IL-Animal 5-13	2019/7/11 18:44:34	5827.21	19.60	297.31	1.00	0.00	231	0.00	231	0.00	231	0.00	231	0.00	0.00	0.00	0.00	0	19.60	0.00	0.00	0	0.00	19.60	177.50	1.00	177.50	1	6.63	0.00	0.00	0	0.00	19.60	0.00	0.00	0.00	0	19.60	0.00	0.00	0	0.00	19.60	1190.10	3.63
86	IL Experiment - Elderly	IL-Animal 5	IL-Animal 5-14	2019-07-16 16:42:33	9628.73	79.97	120.41	19.00	1.00	0	79.97	0	80.00	0	79.97	0	79.97	2341.50	21.60	108.40	5	5.50	5.50	0.50	2	2.50	12.33	454.80	3.50	129.94	2	52.00	0.50	0.00	0	0.00	79.97	921.14	5.00	184.23	1	74.00	1.50	0.00	0	0.00	79.97	2332.81	11.70
87	IL Experiment - Elderly	IL-Animal 5	IL-Animal 5-15	2019/7/11 19:05:16	7556.60	60.00	125.94	11.50	6.50	232	0.00	232	0.00	232	0.00	232	0.00	659.29	13.00	50.71	2	8.03	5.00	3.50	1	1.50	6.53	0.00	0.00	0.00	0	60.00	0.00	0.00	0	0.00	60.00	320.22	4.50	71.16	2	48.47	1.00	0.00	1	1.07	51.47	1129.82	10.50
88	IL Experiment - Elderly	IL-Animal 5	IL-Animal 5-16	2019/7/14 15:26:33	13593.32	138.17	98.38	81.50	0.00	454	0.00	454	0.00	454	0.00	454	0.00	236.56	4.00	59.14	2	89.87	2.00	0.00	1	1.50	104.87	0.00	0.00	0.00	0	138.17	0.00	0.00	1	4.00	82.37	1448.26	20.67	70.08	6	2.30	11.00	0.00	3	2.33	12.10	292.62	51.00
89	IL Experiment - Elderly	IL-Animal 5	IL-Animal 5-17	2019/7/14 15:30:02	34298.51	314.23	109.15	115.30	0.00	440	0.00	440	0.00	440	0.00	440	0.00	1103.65	13.53	81.57	2	352.17	5.50	0.00	2	7.00	276.25	3560.55	44.97	79.18	7	33.77	19.50	0.00	7	7.00	30.00	4441.92	97.70	45.46	13	6.23	62.33	0.00	6	5.60	94.30	3805.37	29.43
90	IL Experiment - Elderly	IL-Animal 5	IL-Animal 5-18	2019/7/14 15:38:46	15256.62	109.27	139.63	31.87	3.50	456	0.00	456	0.00	456	0.00	456	0.00	304.08	2.53	120.03	1	27.00	0.00	0.00	0	0.00	109.27	555.04	6.03	92.00	3	13.33	2.00	0.00	2	2.40	12.33	2022.74	34.13	59.26	4	59.90	15.87	3.50	4	3.63	59.17	885.39	5.40
91	IL Experiment - Elderly	IL-Animal 6	IL-Animal 6-1	2019/7/11 19:19:55	42305.19	251.55	168.18	99.51	3.50	237	0.00	237	0.00	237	0.00	237	0.00	2311.81	26.41	87.55	4	141.43	11.50	0.00	6	12.60	113.93	16747.33	36.37	460.50	5	26.00	22.50	1.00	5	5.50	24.50	853.99	9.07	94.19	2	74.57	4.50	0.50	6	6.00	73.57	5053.82	56.77
92	IL Experiment - Elderly	IL-Animal 6	IL-Animal 6-2	2019/7/11 19:26:51	7276.20	108.40	67.12	44.47	3.50	239	0.00	239	0.00	239	0.00	239	0.00	859.97	16.50	52.12	5	3.50	8.50	0.00	5	9.50	2.50	0.00	0.00	0.00	0	108.40	0.00	0.00	0	0.00	108.40	0.00	0.00	0.00	0	108.40	0.00	0.00	0	0.00	108.40	3233.43	49.40
93	IL Experiment - Elderly	IL-Animal 6	IL-Animal 6-3	2019/7/11 19:29:58	8062.27	77.77	103.67	29.00	1.50	234	0.00	234	0.00	234	0.00	234	0.00	357.65	12.50	28.61	3	3.00	7.50	0.50	2	7.97	0.53	0.00	0.00	0.00	0	77.77	0.00	0.00	0	0.00	77.77	371.88	5.00	74.38	1	67.37	1.50	0.00	1	4.50	62.87	1890.02	14.47
94	IL Experiment - Elderly	IL-Animal 6	IL-Animal 6-4	2019/7/11 19:32:07	4022.07	44.77	89.85	19.47	0.00	255	0.00	255	0.00	255	0.00	255	0.00	1341.93	15.17	88.48	1	14.63	8.00	0.00	3	3.13	2.50	0.00	0.00	0.00	0	44.77	0.00	0.00	0	0.00	44.77	200.04	3.50	57.16	1	31.80	1.50	0.00	2	3.50	29.80	1142.60	14.10
95	IL Experiment - Elderly	IL-Animal 6	IL-Animal 6-5	2019/7/11 19:33:13	4469.91	57.17	78.19	20.50	6.00	250	0.00	250	0.00	250	0.00	250	0.00	61.23	4.50	13.61	1	6.80	4.00	0.00	1	1.00	5.80	0.00	0.00	0.00	0	57.17	0.00	0.00	0	0.00	57.17	0.00	0.00	0.00	0	57.17	0.00	0.00	0	0.00	57.17	1891.06	24.93
96	IL Experiment - Elderly	IL-Animal 6	IL-Animal 6-6	2019/7/11 19:34:41	8003.59	61.83	129.44	22.00	4.50	252	0.00	252	0.00	251	0.00	251	0.00	391.27	7.00	55.89	1	6.87	3.00	0.00	0	0.00	61.83	35.39	1.00	35.39	1	59.87	0.50	0.00	0	0.00	61.83	549.22	17.00	32.31	3	17.87	7.50	4.50	2	4.00	12.87	984.30	6.33
97	IL Experiment - Elderly	IL-Animal 6	IL-Animal 6-7	2019/7/11 19:36:11	4604.69	88.03	52.31	50.97	5.50	256	0.00	256	0.00	256	0.00	256	0.00	0.00	0.00	0.00	0	88.03	0.00	0.00	0	0.00	88.03	0.00	0.00	0.00	0	88.03	0.00	0.00	0	0.00	88.03	573.05	18.00	31.84	3	22.70	10.50	3.50	3	13.50	20.20	1195.45	12.67
98	IL Experiment - Elderly	IL-Animal 6	IL-Animal 6-8	2019/7/11 19:38:31	3622.98	40.53	89.38	17.00	0.00	258	0.00	258	0.00	258	0.00	258	0.00	474.90	7.50	63.32	2	13.07	3.50	0.00	2	1.50	15.57	0.00	0.00	0.00	0	40.53	0.00	0.00	0	0.00	40.53	762.55	11.50	66.31	2	21.07	5.50	0.00	1	1.50	33.07	1286.86	12.53
99	IL Experiment - Elderly	IL-Animal 6	IL-Animal 6-9	2019/7/11 19:39:37	2966.67	16.07	184.65	4.00	0.00	240	0.00	240	0.00	240	0.00	240	0.00	136.83	3.50	39.09	1	2.50	2.50	0.00	0	0.00	16.07	0.00	0.00	0.00	0	16.07	0.00	0.00	2	2.50	11.60	0.00	0.00	0.00	0	16.07	0.00	0.00	0	0.00	16.07	2176.38	10.57
100	IL Experiment - Elderly	IL-Animal 6	IL-Animal 6-10	2019/7/11 19:40:23	3878.13	43.27	89.63	18.47	0.50	228	0.00	228	0.00	228	0.00	228	0.00	520.86	10.17	51.23	2	3.00	7.50	0.00	0	0.00	43.27	1049.25	13.00	80.71	2	17.80	4.50	0.50	1	1.00	25.30	0.00	0.00	0.00	0	43.27	0.00	0.00	0	0.00	43.27	846.68	5.10
101	IL Experiment - Elderly	IL-Animal 6	IL-Animal 6-11	2019/7/11 19:41:30	4197.10	31.63	132.68	10.47	0.50	235	0.00	236	0.00	235	0.00	235	0.00	0.00	0.00	0.00	0	31.63	0.00	0.00	0	0.00	31.63	0.00	0.00	0.00	0	31.63	0.00	0.00	0	0.00	31.63	0.00	0.00	0.00	0	31.63	0.00	0.00	0	0.00	31.63	2260.49	26.70
102	IL Experiment - Elderly	IL-Animal 6	IL-Animal 6-12	2019/7/11 19:42:32	1809.25	16.47	109.87	5.50	0.00	242	0.00	242	0.00	242	0.00	242	0.00	616.02	9.00	68.45	1	4.50	4.50	0.00	2	1.50	3.50	0.00	0.00	0.00	0	16.47	0.00	0.00	0	0.00	16.47	0.00	0.00	0.00	0	16.47	0.00	0.00	0	0.00	16.47	429.73	3.97
103	IL Experiment - Elderly	IL-Animal 6	IL-Animal 6-13	2019/7/11 19:43:11	3282.86	31.70	103.56	10.83	1.00	244	0.00	244	0.00	243	0.00	243	0.00	198.30	3.50	56.66	1	5.73	1.50	0.00	0	0.00	31.70	35.39	0.50	70.78	1	23.23	0.00	0.00	1	1.00	22.23	0.00	0.00	0.00	0	31.70	0.00	0.00	0	0.00	31.70	1741.11	11.87
104	IL Experiment - Elderly	IL-Animal 6	IL-Animal 6-14	2019-07-16 17:12:31	4776.08	27.10	176.24	4.63	0.00	0	27.10	0	50.10	0	27.10	0	27.10	590.63	5.93	99.54	2	8.33	1.57	0.00	1	1.00	37.23	0.00	0.00	0.00	0	27.10	0.00	0.00	0	0.00	27.10	368.96	1.50	245.98	1	39.73	0.00	0.00	1	1.00	38.73	484.49	3.67
105	IL Experiment - Elderly	IL-Animal 6	IL-Animal 6-15	2019/7/11 19:49:24	9017.47	98.00	92.02	49.10	2.00	245	0.00	245	0.00	245	0.00	245	0.00	1108.89	19.57	56.67	3	2.50	8.07	2.00	3	4.50	1.00	0.00	0.00	0.00	0	98.00	0.00	0.00	0	0.00	98.00	332.46	2.00	166.23	1	112.93	0.00	0.00	2	4.00	108.43	3004.71	45.07
106	IL Experiment - Elderly	IL-Animal 6	IL-Animal 6-16	2019/7/14 15:43:30	25143.17	93.54	268.80	26.10	0.00	492	0.00	492	0.00	492	0.00	492	0.00	0.00	0.00	0.00	0	93.54	0.00	0.00	0	0.00	93.54	0.00	0.00	0.00	0	93.54	0.00	0.00	0	0.00	93.54	2403.97	17.27	139.21	7	17.63	3.00	0.00	2	4.60	64.13	0.00	0.00
107	IL Experiment - Elderly	IL-Animal 6	IL-Animal 6-17	2019/7/14 15:47:55	4148.15	17.97	230.88	2.00	0.00	494	0.00	494	0.00	494	0.00	494	0.00	0.00	0.00	0.00	0	17.97	0.00	0.00	0	0.00	17.97	0.00	0.00	0.00	0	17.97	0.00	0.00	0	0.00	17.97	703.91	7.57	93.03	1	3.53	2.00	0.00	2	2.53	2.50	0.00	0.00
108	IL Experiment - Elderly	IL-Animal 6	IL-Animal 6-18	2019/7/14 15:49:12	18218.82	115.01	158.42	48.34	0.00	442	0.00	442	0.00	442	0.00	442	0.00	0.00	0.00	0.00	0	115.01	0.00	0.00	0	0.00	115.01	539.65	7.00	77.09	2	75.13	2.50	0.00	1	1.50	73.63	860.00	11.83	72.67	3	8.33	6.50	0.00	2	11.57	7.33	0.00	0.00
109	IL Experiment - Elderly	IL-Animal 7	IL-Animal 7-1	2019/7/11 19:56:41	42219.13	338.97	124.55	156.51	5.00	247	0.00	247	0.00	247	0.00	247	0.00	11785.91	92.01	128.10	9	22.00	46.50	4.00	9	13.00	2.00	3935.82	7.50	524.78	1	58.00	4.50	0.00	0	0.00	338.97	4146.31	75.00	55.28	7	154.00	40.00	0.50	8	12.00	9.00	14036.51	77.47
110	IL Experiment - Elderly	IL-Animal 7	IL-Animal 7-2	2019/7/11 20:04:41	9885.13	74.13	133.34	16.00	0.00	237	0.00	237	0.00	237	0.00	237	0.00	449.53	9.67	46.50	3	2.50	4.50	0.00	1	1.50	18.03	0.00	0.00	0.00	0	74.13	0.00	0.00	1	2.00	28.70	283.74	3.50	81.07	1	51.13	1.00	0.00	0	0.00	74.13	1932.86	14.50
111	IL Experiment - Elderly	IL-Animal 7	IL-Animal 7-3	2019/7/11 20:06:31	6649.01	42.47	156.57	7.00	0.50	239	0.00	239	0.00	239	0.00	239	0.00	208.94	3.23	64.62	1	10.47	1.00	0.00	0	0.00	42.47	0.00	0.00	0.00	0	42.47	0.00	0.00	0	0.00	42.47	0.00	0.00	0.00	0	42.47	0.00	0.00	0	0.00	42.47	1591.32	12.73
112	IL Experiment - Elderly	IL-Animal 7	IL-Animal 7-4	2019/7/11 20:07:36	12976.26	107.07	121.20	40.50	0.50	250	0.00	250	0.00	250	0.00	250	0.00	770.27	22.00	35.01	4	35.27	16.00	0.00	1	1.50	3.20	173.15	1.50	115.44	1	29.23	0.50	0.00	0	0.00	107.07	0.00	0.00	0.00	0	107.07	0.00	0.00	0	0.00	107.07	5050.12	29.23
113	IL Experiment - Elderly	IL-Animal 7	IL-Animal 7-5	2019/7/11 20:10:09	6982.30	31.23	223.55	4.50	0.00	231	0.00	231	0.00	231	0.00	231	0.00	0.00	0.00	0.00	0	31.23	0.00	0.00	0	0.00	31.23	0.00	0.00	0.00	0	31.23	0.00	0.00	0	0.00	31.23	0.00	0.00	0.00	0	31.23	0.00	0.00	0	0.00	31.23	1537.86	10.30
114	IL Experiment - Elderly	IL-Animal 7	IL-Animal 7-6	2019/7/11 20:10:59	6784.62	34.13	198.77	3.47	0.00	247	0.00	247	0.00	247	0.00	247	0.00	0.00	0.00	0.00	0	34.13	0.00	0.00	0	0.00	34.13	0.00	0.00	0.00	0	34.13	0.00	0.00	1	0.50	12.57	0.00	0.00	0.00	0	34.13	0.00	0.00	0	0.00	34.13	1458.52	6.83
115	IL Experiment - Elderly	IL-Animal 7	IL-Animal 7-7	2019/7/11 20:11:50	5864.65	18.90	310.30	0.50	0.00	234	0.00	234	0.00	234	0.00	234	0.00	0.00	0.00	0.00	0	18.90	0.00	0.00	0	0.00	18.90	0.00	0.00	0.00	0	18.90	0.00	0.00	0	0.00	18.90	0.00	0.00	0.00	0	18.90	0.00	0.00	0	0.00	18.90	1380.80	4.37
116	IL Experiment - Elderly	IL-Animal 7	IL-Animal 7-8	2019/7/11 20:12:22	6037.21	20.60	293.07	0.00	0.00	245	0.00	245	0.00	245	0.00	245	0.00	0.00	0.00	0.00	0	20.60	0.00	0.00	0	0.00	20.60	0.00	0.00	0.00	0	20.60	0.00	0.00	0	0.00	20.60	0.00	0.00	0.00	0	20.60	0.00	0.00	0	0.00	20.60	1390.93	4.60
117	IL Experiment - Elderly	IL-Animal 7	IL-Animal 7-9	2019/7/11 20:12:54	5895.77	18.40	320.42	1.50	0.00	258	0.00	258	0.00	258	0.00	258	0.00	0.00	0.00	0.00	0	18.40	0.00	0.00	0	0.00	18.40	0.00	0.00	0.00	0	18.40	0.00	0.00	0	0.00	18.40	0.00	0.00	0.00	0	18.40	0.00	0.00	0	0.00	18.40	1335.67	3.97
118	IL Experiment - Elderly	IL-Animal 7	IL-Animal 7-10	2019/7/11 20:13:23	6130.62	23.97	255.80	0.50	0.00	255	0.00	255	0.00	255	0.00	255	0.00	0.00	0.00	0.00	0	23.97	0.00	0.00	1	2.50	1.50	0.00	0.00	0.00	0	23.97	0.00	0.00	0	0.00	23.97	0.00	0.00	0.00	0	23.97	0.00	0.00	0	0.00	23.97	1533.88	7.37
119	IL Experiment - Elderly	IL-Animal 7	IL-Animal 7-11	2019/7/11 20:14:00	5596.23	15.53	360.27	0.00	0.00	253	0.00	253	0.00	253	0.00	253	0.00	0.00	0.00	0.00	0	15.53	0.00	0.00	0	0.00	15.53	0.00	0.00	0.00	0	15.53	0.00	0.00	0	0.00	15.53	0.00	0.00	0.00	0	15.53	0.00	0.00	0	0.00	15.53	1138.97	2.60
120	IL Experiment - Elderly	IL-Animal 7	IL-Animal 7-12	2019/7/11 20:14:26	5611.58	19.67	285.33	1.00	0.00	229	0.00	229	0.00	229	0.00	229	0.00	0.00	0.00	0.00	0	19.67	0.00	0.00	0	0.00	19.67	63.21	0.50	126.42	1	9.03	0.00	0.00	0	0.00	19.67	0.00	0.00	0.00	0	19.67	0.00	0.00	0	0.00	19.67	1289.84	5.97
121	IL Experiment - Elderly	IL-Animal 7	IL-Animal 7-13	2019/7/11 20:14:57	6286.45	19.90	315.90	0.50	0.00	228	0.00	228	0.00	228	0.00	228	0.00	103.30	1.50	68.87	1	3.00	0.50	0.00	1	1.00	2.00	0.00	0.00	0.00	0	19.90	0.00	0.00	0	0.00	19.90	0.00	0.00	0.00	0	19.90	0.00	0.00	0	0.00	19.90	1642.87	6.50
122	IL Experiment - Elderly	IL-Animal 7	IL-Animal 7-14	2019-07-16 16:45:49	8514.58	40.83	208.52	5.10	0.00	0	40.83	0	53.83	0	40.83	0	40.83	476.78	3.50	136.22	2	8.63	0.50	0.00	1	1.50	18.00	167.45	1.93	86.62	2	26.93	0.00	0.00	1	0.93	30.43	148.16	1.20	123.47	1	41.63	0.70	0.00	1	1.90	47.70	2146.85	11.17
123	IL Experiment - Elderly	IL-Animal 7	IL-Animal 7-15	2019/7/11 20:16:47	8966.18	46.83	191.45	8.97	1.00	242	0.00	242	0.00	242	0.00	242	0.00	404.36	4.00	101.09	2	9.07	1.00	0.00	2	1.57	12.07	0.00	0.00	0.00	0	46.83	0.00	0.00	0	0.00	46.83	0.00	0.00	0.00	0	46.83	0.00	0.00	0	0.00	46.83	3676.49	24.63
124	IL Experiment - Elderly	IL-Animal 7	IL-Animal 7-16	2019/7/14 15:53:50	15719.37	97.13	161.83	22.30	0.00	476	0.00	476	0.00	476	0.00	476	0.00	38.19	1.13	33.69	1	110.97	0.50	0.00	1	1.00	93.57	0.00	0.00	0.00	0	97.13	0.00	0.00	1	1.30	76.50	1054.70	6.17	171.04	3	6.17	1.20	0.00	2	1.77	59.73	3169.38	23.23
125	IL Experiment - Elderly	IL-Animal 7	IL-Animal 7-17	2019/7/14 15:58:12	18985.07	96.43	196.88	14.07	0.00	458	0.00	458	0.00	458	0.00	458	0.00	0.00	0.00	0.00	0	96.43	0.00	0.00	3	2.80	30.33	111.25	1.00	111.25	1	88.73	0.00	0.00	1	0.97	37.83	85.10	1.00	85.10	1	69.30	0.00	0.00	3	6.60	54.20	3979.75	20.93
126	IL Experiment - Elderly	IL-Animal 7	IL-Animal 7-18	2019/7/14 16:03:00	9671.45	32.33	299.12	3.50	0.00	446	0.00	446	0.00	446	0.00	446	0.00	534.83	1.30	411.42	1	51.43	0.00	0.00	0	0.00	32.33	0.00	0.00	0.00	0	32.33	0.00	0.00	0	0.00	32.33	0.00	0.00	0.00	0	32.33	0.00	0.00	0	0.00	32.33	5371.89	18.50
127	IL Experiment - Elderly	IL-Animal 8	IL-Animal 8-1	2019/7/11 20:29:05	17514.68	228.25	76.73	125.47	20.50	235	0.00	236	0.00	235	0.00	235	0.00	4009.82	61.03	65.70	3	14.50	41.00	8.00	6	10.50	5.50	998.15	11.67	85.54	2	151.54	4.47	0.50	4	6.50	151.04	911.92	10.54	86.56	1	212.65	5.50	0.00	0	0.00	228.25	5869.43	65.97
128	IL Experiment - Elderly	IL-Animal 8	IL-Animal 8-2	2019/7/11 20:34:39	11906.45	125.80	94.65	44.97	3.50	244	0.00	244	0.00	243	0.00	243	0.00	1417.27	25.83	54.86	2	7.40	16.07	1.00	1	1.00	19.40	1258.68	13.53	93.01	2	47.53	5.97	0.00	2	2.90	46.53	955.25	10.40	91.85	2	96.37	4.03	0.00	2	3.87	95.37	1441.53	13.67
129	IL Experiment - Elderly	IL-Animal 8	IL-Animal 8-3	2019/7/11 20:37:45	10981.31	113.37	96.87	41.00	5.00	232	0.00	232	0.00	232	0.00	232	0.00	979.04	23.67	41.37	3	8.00	15.00	0.50	0	0.00	113.37	542.60	7.00	77.52	1	49.67	4.50	0.50	1	1.00	48.67	539.55	12.50	43.16	3	80.47	7.00	0.50	1	1.00	91.00	2412.93	20.80
130	IL Experiment - Elderly	IL-Animal 8	IL-Animal 8-4	2019/7/11 20:40:34	9979.06	93.43	106.81	32.30	1.00	256	0.00	256	0.00	256	0.00	256	0.00	1056.06	19.93	52.98	3	2.50	11.23	0.00	0	0.00	93.43	0.00	0.00	0.00	0	93.43	0.00	0.00	0	0.00	93.43	197.43	4.50	43.87	2	72.97	2.50	0.00	3	7.03	70.93	2565.52	20.03
131	IL Experiment - Elderly	IL-Animal 8	IL-Animal 8-5	2019/7/11 20:42:52	9102.17	79.70	114.21	25.50	0.50	248	0.00	248	0.00	248	0.00	248	0.00	171.67	2.00	85.83	1	13.33	0.50	0.00	0	0.00	79.70	198.90	4.50	44.20	1	31.40	3.50	0.00	2	4.50	22.17	756.12	13.07	57.87	3	48.00	7.00	0.00	2	3.00	47.00	2167.30	13.30
132	IL Experiment - Elderly	IL-Animal 8	IL-Animal 8-6	2019/7/11 20:44:54	9755.06	93.13	104.74	34.00	0.00	252	0.00	252	0.00	251	0.00	251	0.00	611.53	7.40	82.64	2	4.00	3.50	0.00	1	2.00	2.00	1021.76	18.03	56.66	3	19.23	10.50	0.00	3	3.03	22.73	955.99	7.30	130.96	1	66.93	2.50	0.00	1	1.80	72.43	1553.05	8.80
133	IL Experiment - Elderly	IL-Animal 8	IL-Animal 8-7	2019/7/11 20:47:12	9430.29	62.50	150.89	11.00	0.00	229	0.00	229	0.00	229	0.00	229	0.00	1724.75	10.23	168.54	2	2.00	2.00	0.00	2	1.50	8.30	37.37	1.00	37.37	1	32.43	0.50	0.00	1	1.00	31.43	0.00	0.00	0.00	0	62.50	0.00	0.00	0	0.00	62.50	1789.02	10.20
134	IL Experiment - Elderly	IL-Animal 8	IL-Animal 8-8	2019/7/11 20:48:44	12248.39	77.07	158.93	13.50	0.50	228	0.00	228	0.00	228	0.00	228	0.00	428.07	3.30	129.72	2	4.07	1.50	0.00	0	0.00	77.07	666.41	10.17	65.55	3	15.87	5.00	0.50	1	0.50	15.37	892.10	8.60	103.73	4	39.97	2.50	0.00	0	0.00	77.07	1739.02	7.03
135	IL Experiment - Elderly	IL-Animal 8	IL-Animal 8-9	2019/7/11 20:50:36	7092.06	37.40	189.63	2.50	0.00	240	0.00	240	0.00	240	0.00	240	0.00	337.72	1.10	307.01	1	9.73	0.00	0.00	0	0.00	37.40	0.00	0.00	0.00	0	37.40	0.00	0.00	0	0.00	37.40	0.00	0.00	0.00	0	37.40	0.00	0.00	0	0.00	37.40	1753.15	11.10
136	IL Experiment - Elderly	IL-Animal 8	IL-Animal 8-10	2019/7/11 20:51:34	6834.79	42.70	160.07	5.00	0.50	231	0.00	231	0.00	231	0.00	231	0.00	356.87	1.67	214.12	1	2.93	0.00	0.00	0	0.00	42.70	701.70	5.67	123.83	1	18.07	2.00	0.00	0	0.00	42.70	148.96	2.50	59.58	1	31.93	1.00	0.00	0	0.00	42.70	897.96	4.97
137	IL Experiment - Elderly	IL-Animal 8	IL-Animal 8-11	2019/7/11 20:52:38	7737.68	34.33	225.37	2.00	0.00	0	0.00	0	0.00	0	0.00	0	0.00	189.06	2.50	75.62	2	5.77	1.00	0.00	0	0.00	34.33	0.00	0.00	0.00	0	34.33	0.00	0.00	1	3.50	13.30	0.00	0.00	0.00	0	34.33	0.00	0.00	0	0.00	34.33	2209.53	8.23
138	IL Experiment - Elderly	IL-Animal 8	IL-Animal 8-12	2019/7/11 20:53:32	6375.39	27.53	231.55	0.97	0.00	242	0.00	242	0.00	242	0.00	242	0.00	46.91	0.50	93.83	1	8.70	0.00	0.00	1	0.50	8.20	0.00	0.00	0.00	0	27.53	0.00	0.00	0	0.00	27.53	0.00	0.00	0.00	0	27.53	0.00	0.00	0	0.00	27.53	1792.48	8.67
139	IL Experiment - Elderly	IL-Animal 8	IL-Animal 8-13	2019/7/11 20:54:14	6966.04	34.43	202.31	2.50	0.00	232	0.00	232	0.00	232	0.00	232	0.00	260.09	3.00	86.70	1	2.00	1.50	0.00	1	1.00	1.00	0.00	0.00	0.00	0	34.43	0.00	0.00	0	0.00	34.43	0.00	0.00	0.00	0	34.43	0.00	0.00	0	0.00	34.43	2013.14	9.57
140	IL Experiment - Elderly	IL-Animal 8	IL-Animal 8-14	2019-07-16 16:47:11	7056.55	31.47	224.26	1.70	0.00	0	31.47	0	34.07	0	31.47	0	31.47	552.32	2.70	204.56	2	3.90	0.00	0.00	1	0.77	6.20	119.95	1.00	119.95	1	12.93	0.00	0.00	1	0.80	12.13	0.00	0.00	0.00	0	31.47	0.00	0.00	2	2.67	23.07	1620.84	5.77
141	IL Experiment - Elderly	IL-Animal 8	IL-Animal 8-15	2019/7/11 20:58:10	7946.23	93.17	85.29	10.07	45.50	248	0.00	248	0.00	248	0.00	248	0.00	0.00	0.00	0.00	0	93.17	0.00	0.00	1	1.00	9.57	408.11	2.03	200.71	2	15.60	0.00	0.00	0	0.00	93.17	180.86	1.83	98.65	1	37.17	0.50	0.00	2	1.83	36.17	1743.83	12.03
142	IL Experiment - Elderly	IL-Animal 8	IL-Animal 8-16	2019/7/14 16:05:07	26800.87	219.02	122.37	75.81	0.00	460	0.00	460	0.00	460	0.00	460	0.00	994.62	5.23	190.01	1	226.42	0.50	0.00	4	4.00	208.05	0.00	0.00	0.00	0	219.02	0.00	0.00	0	0.00	219.02	5253.67	64.48	81.48	12	3.00	31.01	0.00	12	13.67	2.47	4409.39	29.77
143	IL Experiment - Elderly	IL-Animal 8	IL-Animal 8-17	2019/7/14 16:13:26	34273.98	346.68	98.86	150.16	0.00	462	0.00	462	0.00	462	0.00	462	0.00	0.00	0.00	0.00	0	346.68	0.00	0.00	2	3.00	342.70	399.73	5.40	74.02	1	80.53	2.00	0.00	1	3.00	90.60	5266.15	123.76	42.55	16	8.10	85.10	0.00	12	15.20	15.73	2706.52	32.49
144	IL Experiment - Elderly	IL-Animal 8	IL-Animal 8-18	2019/7/14 16:22:53	33306.81	266.45	125.00	96.21	0.00	502	0.00	502	0.00	502	0.00	502	0.00	2097.84	25.23	83.13	4	214.85	11.50	0.00	6	13.47	195.98	218.50	3.00	72.84	1	49.60	1.00	0.00	0	0.00	266.45	6015.65	105.14	57.21	17	1.73	60.24	0.00	9	10.33	36.40	3830.32	17.63
145	IL Experiment - Elderly	PL-Animal 1	PL-Animal 1-1	2019/7/12 14:27:53	39949.37	74.47	536.48	19.00	12.00	262	0.00	262	0.00	262	0.00	262	0.00	13230.77	21.00	630.05	3	24.57	4.00	6.50	3	8.00	22.07	0.00	0.00	0.00	0	74.47	0.00	0.00	0	0.00	74.47	0.00	0.00	0.00	0	74.47	0.00	0.00	0	0.00	74.47	23352.56	41.50
146	IL Experiment - Elderly	PL-Animal 1	PL-Animal 1-2	2019/7/12 14:29:42	5317.15	30.97	171.71	13.97	2.00	0	0.00	0	0.00	0	0.00	0	0.00	89.05	5.00	17.81	1	14.00	3.50	0.50	2	2.50	1.00	0.00	0.00	0.00	0	30.97	0.00	0.00	0	0.00	30.97	0.00	0.00	0.00	0	30.97	0.00	0.00	0	0.00	30.97	5116.85	24.97
147	IL Experiment - Elderly	PL-Animal 1	PL-Animal 1-3	2019/7/12 14:30:29	2720.78	42.87	63.47	19.50	3.00	235	0.00	236	0.00	235	0.00	235	0.00	450.89	15.20	29.66	2	4.00	9.50	1.50	1	1.00	3.00	0.00	0.00	0.00	0	42.87	0.00	0.00	0	0.00	42.87	0.00	0.00	0.00	0	42.87	0.00	0.00	0	0.00	42.87	2043.32	25.70
148	IL Experiment - Elderly	PL-Animal 1	PL-Animal 1-4	2019/7/12 16:20:40	7413.73	98.53	75.24	17.97	46.50	229	0.00	229	0.00	229	0.00	229	0.00	681.59	5.00	136.32	2	6.23	2.00	0.00	1	2.00	1.23	799.69	8.03	99.55	1	25.63	4.00	0.50	1	1.00	24.63	0.00	0.00	0.00	0	98.53	0.00	0.00	1	0.50	8.23	2777.43	12.10
149	IL Experiment - Elderly	PL-Animal 1	PL-Animal 1-5	2019/7/12 16:23:05	16057.23	95.70	167.79	38.00	28.00	0	0.00	0	0.00	0	0.00	0	0.00	3498.20	7.00	499.74	2	11.00	1.00	0.00	3	1.50	11.50	0.00	0.00	0.00	0	95.70	0.00	0.00	0	0.00	95.70	0.00	0.00	0.00	0	95.70	0.00	0.00	0	0.00	95.70	6140.52	16.47
150	IL Experiment - Elderly	PL-Animal 1	PL-Animal 1-6	2019/7/12 16:25:25	15704.93	283.49	55.40	275.99	0.00	0	0.00	500	0.00	0	0.00	0	0.00	4321.44	1.50	2881.00	1	20.00	0.00	0.00	2	15.50	9.50	0.00	0.00	0.00	0	283.49	0.00	0.00	0	0.00	283.49	0.00	0.00	0.00	0	283.49	0.00	0.00	0	0.00	283.49	1883.97	25.97
151	IL Experiment - Elderly	PL-Animal 1	PL-Animal 1-7	2019/7/12 16:32:08	124861.45	368.96	338.41	292.45	0.50	234	0.00	234	0.00	234	0.00	234	0.00	1728.88	0.50	3457.82	1	16.50	0.00	0.00	8	87.47	0.53	0.00	0.00	0.00	0	368.96	0.00	0.00	0	0.00	368.96	19219.24	35.01	549.01	7	127.50	19.00	0.50	13	20.50	52.00	1073.33	15.97
152	IL Experiment - Elderly	PL-Animal 1	PL-Animal 1-8	2019/7/13 18:58:16	8573.51	56.20	152.56	16.10	0.50	0	56.20	0	66.80	0	56.20	0	56.20	858.23	6.73	127.46	1	2.50	2.50	0.00	0	0.00	56.20	0.00	0.00	0.00	0	56.20	0.00	0.00	1	1.50	26.53	632.83	16.50	38.35	2	37.23	10.50	0.50	1	1.17	36.07	1175.66	4.47
153	IL Experiment - Elderly	PL-Animal 1	PL-Animal 1-9	2019/7/13 18:59:55	13177.66	100.60	130.99	30.97	0.00	0	100.60	0	110.07	0	100.60	0	100.60	346.56	8.63	40.14	1	0.00	5.97	0.00	0	0.00	100.60	1720.33	22.47	76.57	3	42.80	11.50	0.00	3	3.50	38.83	1670.74	16.47	101.46	3	20.83	6.00	0.00	4	4.23	28.57	1497.06	6.33
154	IL Experiment - Elderly	PL-Animal 1	PL-Animal 1-10	2019/7/13 19:02:36	27312.43	234.69	116.38	82.51	5.50	0	234.69	0	253.66	0	234.69	0	234.69	5294.39	55.10	96.08	5	3.40	26.07	1.00	7	6.23	2.40	735.09	10.17	72.29	4	33.37	5.23	0.00	3	4.50	31.37	1994.67	37.94	52.58	6	45.10	19.17	4.50	4	4.53	153.40	3710.17	20.13
155	IL Experiment - Elderly	PL-Animal 1	PL-Animal 1-11	2019/7/13 19:08:38	10311.69	88.07	117.09	32.23	0.00	0	88.07	0	94.63	0	88.07	0	88.07	1406.91	17.87	78.75	5	3.13	8.13	0.00	1	1.50	64.40	215.02	5.23	41.09	2	12.73	3.00	0.00	1	2.00	23.63	139.90	2.50	55.96	1	82.93	1.00	0.00	1	4.50	78.43	3842.20	20.97
156	IL Experiment - Elderly	PL-Animal 1	PL-Animal 1-12	2019/7/13 19:10:56	14342.63	128.07	111.99	45.00	0.00	0	128.07	0	130.30	0	128.07	0	128.07	838.74	11.30	74.23	3	4.30	6.00	0.00	3	6.10	46.47	971.56	9.50	102.27	2	91.93	1.00	0.00	0	0.00	128.07	1115.05	23.97	46.53	4	24.40	15.00	0.00	0	0.00	128.07	2531.04	12.13
157	IL Experiment - Elderly	PL-Animal 1	PL-Animal 1-13	2019/7/13 19:14:05	45022.48	445.60	101.04	170.65	1.00	0	445.60	0	490.07	0	445.60	0	445.60	2247.71	29.63	75.85	8	44.47	13.50	0.00	6	11.70	163.67	2357.77	27.29	86.38	8	102.00	8.10	0.00	10	21.86	103.00	1979.44	19.27	102.73	5	219.92	6.50	0.00	8	7.87	219.42	15535.85	145.29
158	IL Experiment - Elderly	PL-Animal 1	PL-Animal 1-14	2019-07-16 16:48:06	9333.52	45.10	206.95	10.00	0.00	0	45.10	0	52.10	0	45.10	0	45.10	367.29	2.50	146.92	2	3.17	0.00	0.00	0	0.00	45.10	0.00	0.00	0.00	0	45.10	0.00	0.00	1	1.00	15.43	236.03	5.50	42.92	1	33.70	3.00	0.00	0	0.00	45.10	1351.32	8.60
159	IL Experiment - Elderly	PL-Animal 1	PL-Animal 1-15	2019/7/13 19:29:31	7678.56	43.90	174.91	6.50	0.00	0	43.90	0	58.10	0	43.90	0	43.90	251.38	0.47	538.67	1	8.37	0.00	0.00	0	0.00	43.90	83.43	1.50	55.62	1	24.57	0.50	0.00	0	0.00	43.90	686.71	5.17	132.91	2	36.17	1.50	0.00	2	3.20	41.30	1286.47	9.77
160	IL Experiment - Elderly	PL-Animal 1	PL-Animal 1-16	2019/7/14 17:03:51	34443.59	235.95	145.98	51.24	0.00	517	0.00	517	0.00	516	0.00	516	0.00	978.94	5.73	170.74	2	110.03	2.23	0.00	1	0.50	255.26	2817.53	25.14	112.08	6	35.43	6.50	0.00	6	6.67	40.90	2113.44	15.87	133.20	7	6.47	2.50	0.00	7	6.57	5.90	1432.65	11.26
161	IL Experiment - Elderly	PL-Animal 1	PL-Animal 1-17	2019/7/14 17:12:38	7740.76	52.33	147.91	11.53	0.00	504	0.00	504	0.00	504	0.00	504	0.00	353.11	2.00	176.56	1	40.70	0.00	0.00	0	0.00	52.33	432.91	4.00	108.23	1	31.70	0.50	0.00	0	0.00	52.33	0.00	0.00	0.00	0	52.33	0.00	0.00	0	0.00	52.33	1505.95	10.23
162	IL Experiment - Elderly	PL-Animal 1	PL-Animal 1-18	2019/7/14 17:15:38	10582.12	69.90	151.39	15.60	0.00	506	0.00	506	0.00	506	0.00	506	0.00	0.00	0.00	0.00	0	69.90	0.00	0.00	0	0.00	69.90	0.00	0.00	0.00	0	69.90	0.00	0.00	0	0.00	69.90	324.34	2.47	131.49	1	48.27	0.00	0.00	5	5.97	21.10	2641.03	11.93
163	IL Experiment - Elderly	PL-Animal 2	PL-Animal 2-1	2019/7/12 14:31:33	2362.45	34.93	67.63	16.97	1.00	239	0.00	239	0.00	239	0.00	239	0.00	650.23	10.97	59.29	2	9.00	6.50	0.00	2	1.50	8.50	0.00	0.00	0.00	0	34.93	0.00	0.00	0	0.00	34.93	0.00	0.00	0.00	0	34.93	0.00	0.00	0	0.00	34.93	1651.83	23.00
164	IL Experiment - Elderly	PL-Animal 2	PL-Animal 2-2	2019/7/12 14:32:28	4641.38	9.97	465.69	2.00	0.00	244	0.00	244	0.00	243	0.00	243	0.00	0.00	0.00	0.00	0	9.97	0.00	0.00	0	0.00	9.97	0.00	0.00	0.00	0	9.97	0.00	0.00	0	0.00	9.97	0.00	0.00	0.00	0	9.97	0.00	0.00	0	0.00	9.97	4527.69	8.50
165	IL Experiment - Elderly	PL-Animal 2	PL-Animal 2-3	2019/7/12 14:32:46	1980.88	16.33	121.28	3.50	0.00	245	0.00	245	0.00	245	0.00	245	0.00	111.25	1.00	111.25	1	10.37	0.00	0.00	2	2.00	3.87	0.00	0.00	0.00	0	16.33	0.00	0.00	0	0.00	16.33	0.00	0.00	0.00	0	16.33	0.00	0.00	0	0.00	16.33	1513.70	12.50
166	IL Experiment - Elderly	PL-Animal 2	PL-Animal 2-4	2019/7/12 16:40:52	85410.30	251.09	340.16	125.98	4.00	237	0.00	237	0.00	237	0.00	237	0.00	10601.47	54.57	194.27	7	4.07	31.00	1.00	11	14.00	36.57	0.00	0.00	0.00	0	251.09	0.00	0.00	3	15.50	12.57	417.70	13.00	32.12	1	133.10	8.00	0.00	1	1.50	131.60	39318.13	82.01
167	IL Experiment - Elderly	PL-Animal 2	PL-Animal 2-5	2019/7/12 16:46:50	31134.12	36.83	845.28	13.00	0.00	240	0.00	240	0.00	240	0.00	240	0.00	5015.40	1.50	3343.61	1	4.00	0.00	0.00	1	1.00	2.00	0.00	0.00	0.00	0	36.83	0.00	0.00	0	0.00	36.83	0.00	0.00	0.00	0	36.83	0.00	0.00	0	0.00	36.83	15378.73	13.67
168	IL Experiment - Elderly	PL-Animal 2	PL-Animal 2-6	2019/7/12 16:47:46	12641.27	204.98	61.67	182.98	0.00	-1449448033	-0.00	242	0.00	242	0.00	242	0.00	5716.12	12.00	476.35	1	12.00	0.50	0.00	4	6.50	14.00	0.00	0.00	0.00	0	204.98	0.00	0.00	0	0.00	204.98	0.00	0.00	0.00	0	204.98	0.00	0.00	0	0.00	204.98	2818.00	186.98
169	IL Experiment - Elderly	PL-Animal 2	PL-Animal 2-7	2019/7/12 16:52:40	29626.00	310.48	95.42	266.98	2.50	258	0.00	258	0.00	-1377099153	-0.00	258	0.00	7277.77	20.50	355.02	3	87.00	12.50	0.00	6	22.00	69.00	101.40	1.00	101.38	1	138.00	0.00	0.00	2	2.50	137.00	402.56	4.50	89.46	2	110.50	0.50	0.00	1	1.00	111.00	5861.01	87.97
170	IL Experiment - Elderly	PL-Animal 2	PL-Animal 2-8	2019/7/13 19:47:39	8692.38	49.93	174.08	8.00	0.00	0	49.93	0	57.33	0	49.93	0	49.93	0.00	0.00	0.00	0	49.93	0.00	0.00	0	0.00	49.93	308.55	5.57	55.43	2	7.10	2.50	0.00	4	5.47	11.80	501.27	4.27	117.49	1	47.10	1.50	0.00	0	0.00	49.93	1750.20	5.13
171	IL Experiment - Elderly	PL-Animal 2	PL-Animal 2-9	2019/7/13 19:49:05	7843.64	32.47	241.59	2.00	0.00	0	32.47	0	41.17	0	32.47	0	32.47	0.00	0.00	0.00	0	32.47	0.00	0.00	0	0.00	32.47	698.25	2.07	337.86	1	10.70	0.00	0.00	1	1.10	15.80	549.97	1.83	299.99	1	32.53	0.00	0.00	2	1.83	26.10	1501.88	5.77
172	IL Experiment - Elderly	PL-Animal 2	PL-Animal 2-10	2019/7/13 19:50:08	6092.96	24.63	247.35	1.00	0.00	0	24.63	0	26.00	0	24.63	0	24.63	85.75	0.50	171.49	1	3.47	0.00	0.00	0	0.00	24.63	0.00	0.00	0.00	0	24.63	0.00	0.00	1	0.57	9.67	0.00	0.00	0.00	0	24.63	0.00	0.00	0	0.00	24.63	1094.25	4.93
173	IL Experiment - Elderly	PL-Animal 2	PL-Animal 2-11	2019/7/13 19:50:50	8222.73	46.00	178.76	8.20	0.00	0	46.00	0	46.03	0	46.00	0	46.00	572.28	8.90	64.30	2	6.00	2.80	0.00	1	1.00	5.00	0.00	0.00	0.00	0	46.00	0.00	0.00	2	4.50	23.30	0.00	0.00	0.00	0	46.00	0.00	0.00	1	1.50	40.80	1904.35	8.77
174	IL Experiment - Elderly	PL-Animal 2	PL-Animal 2-12	2019/7/13 19:52:00	8010.36	38.67	207.17	7.00	0.00	0	38.67	0	44.07	0	38.67	0	38.67	0.00	0.00	0.00	0	38.67	0.00	0.00	0	0.00	38.67	561.85	1.67	337.10	1	9.90	0.00	0.00	1	1.17	12.67	384.83	8.60	44.75	2	29.00	4.50	0.00	0	0.00	38.67	1199.68	3.57
175	IL Experiment - Elderly	PL-Animal 2	PL-Animal 2-13	2019/7/13 19:53:08	7949.29	65.63	121.12	24.30	0.00	0	65.63	0	121.77	0	65.63	0	65.63	0.00	0.00	0.00	0	65.63	0.00	0.00	0	0.00	65.63	0.00	0.00	0.00	0	65.63	0.00	0.00	0	0.00	65.63	345.59	8.50	40.66	2	50.23	5.50	0.00	1	1.07	62.17	2034.04	23.13
176	IL Experiment - Elderly	PL-Animal 2	PL-Animal 2-14	2019-07-16 16:49:26	9602.10	57.77	166.22	11.67	0.00	0	57.77	0	69.93	0	57.77	0	57.77	635.11	4.57	139.07	2	7.17	1.00	0.00	1	1.00	12.60	833.20	7.97	104.59	2	17.80	3.50	0.00	1	1.00	16.80	538.95	7.33	73.49	2	50.50	2.00	0.00	1	1.00	49.50	2055.77	9.70
177	IL Experiment - Elderly	PL-Animal 2	PL-Animal 2-15	2019/7/13 19:59:51	8577.93	38.13	224.95	1.00	0.00	0	38.13	0	137.83	0	38.13	0	38.13	845.09	3.37	251.02	1	7.23	0.00	0.00	0	0.00	38.13	705.73	3.17	222.87	1	27.73	0.00	0.00	1	1.27	26.47	159.25	0.87	183.75	1	37.47	0.00	0.00	1	0.73	36.73	1432.95	6.63
178	IL Experiment - Elderly	PL-Animal 2	PL-Animal 2-16	2019/7/14 17:18:21	15060.65	122.40	123.04	41.50	0.00	508	0.00	508	0.00	508	0.00	508	0.00	275.28	9.50	28.98	1	66.30	7.00	0.00	2	4.00	59.80	0.00	0.00	0.00	0	122.40	0.00	0.00	1	2.00	106.30	1643.31	31.97	51.41	5	15.13	17.00	0.00	3	5.00	12.63	5025.07	28.63
179	IL Experiment - Elderly	PL-Animal 2	PL-Animal 2-17	2019/7/14 17:24:12	10036.80	70.00	143.38	21.70	0.00	510	0.00	510	0.00	510	0.00	510	0.00	199.59	3.30	60.48	1	60.30	1.50	0.00	1	0.53	59.77	247.31	0.50	494.64	1	42.47	0.00	0.00	1	1.00	41.47	976.88	13.07	74.76	2	3.87	6.50	0.00	3	2.27	11.93	2485.86	23.13
180	IL Experiment - Elderly	PL-Animal 2	PL-Animal 2-18	2019/7/14 17:28:12	7961.49	36.57	217.73	3.80	0.00	512	0.00	513	0.00	512	0.00	512	0.00	0.00	0.00	0.00	0	36.57	0.00	0.00	0	0.00	36.57	345.25	2.27	152.32	1	26.47	0.50	0.00	2	1.53	25.47	0.00	0.00	0.00	0	36.57	0.00	0.00	0	0.00	36.57	1963.04	11.20
181	IL Experiment - Elderly	PL-Animal 3	PL-Animal 3-1	2019/7/12 14:33:13	2685.22	36.47	73.64	17.00	0.00	247	0.00	247	0.00	247	0.00	247	0.00	940.41	16.00	58.78	1	13.00	9.00	0.00	1	4.00	9.00	0.00	0.00	0.00	0	36.47	0.00	0.00	0	0.00	36.47	0.00	0.00	0.00	0	36.47	0.00	0.00	0	0.00	36.47	582.29	13.47
182	IL Experiment - Elderly	PL-Animal 3	PL-Animal 3-2	2019/7/12 14:34:08	7411.38	116.97	63.36	63.00	25.50	232	0.00	232	0.00	232	0.00	232	0.00	1071.52	25.50	42.02	3	3.50	14.50	2.50	2	3.50	1.00	0.00	0.00	0.00	0	116.97	0.00	0.00	0	0.00	116.97	0.00	0.00	0.00	0	116.97	0.00	0.00	0	0.00	116.97	5637.95	82.50
183	IL Experiment - Elderly	PL-Animal 3	PL-Animal 3-3	2019/7/12 14:36:57	5309.98	111.40	47.67	66.97	2.50	0	0.00	0	0.00	0	0.00	0	0.00	1324.07	33.43	39.60	4	31.00	21.47	0.50	4	14.50	3.00	0.00	0.00	0.00	0	111.40	0.00	0.00	0	0.00	111.40	0.00	0.00	0.00	0	111.40	0.00	0.00	0	0.00	111.40	2068.15	39.50
184	IL Experiment - Elderly	PL-Animal 3	PL-Animal 3-4	2019/7/12 17:00:01	38859.44	136.47	284.75	62.97	8.00	-1401609223	-0.00	252	0.00	251	0.00	251	0.00	160.65	14.00	11.48	1	26.50	11.00	1.00	1	2.50	11.00	0.00	0.00	0.00	0	136.47	0.00	0.00	0	0.00	136.47	997.82	9.50	105.03	3	67.00	3.50	0.00	4	3.00	65.50	14507.14	29.97
185	IL Experiment - Elderly	PL-Animal 3	PL-Animal 3-5	2019/7/12 17:03:18	21075.77	145.14	145.21	37.37	11.00	-1417531514	-0.00	234	0.00	234	0.00	234	0.00	876.39	9.00	97.38	3	8.00	2.50	0.00	1	1.00	98.67	473.27	3.53	133.95	1	88.63	1.00	0.00	1	0.90	91.13	1303.58	13.97	93.34	3	36.90	5.00	1.00	1	0.50	135.67	5878.28	9.13
186	IL Experiment - Elderly	PL-Animal 3	PL-Animal 3-6	2019/7/12 17:06:47	4970.34	270.99	18.34	242.49	0.00	229	0.00	229	0.00	-1429395087	-0.00	229	0.00	0.00	0.00	0.00	0	270.99	0.00	0.00	1	34.00	13.00	0.00	0.00	0.00	0	270.99	0.00	0.00	0	0.00	270.99	0.00	0.00	0.00	0	270.99	0.00	0.00	0	0.00	270.99	4970.34	270.99
187	IL Experiment - Elderly	PL-Animal 3	PL-Animal 3-7	2019/7/12 17:13:13	1074.76	129.97	8.27	124.47	0.50	248	0.00	248	0.00	-1358353395	-0.00	248	0.00	0.00	0.00	0.00	0	129.97	0.00	0.00	0	0.00	129.97	0.00	0.00	0.00	0	129.97	0.00	0.00	0	0.00	129.97	0.00	0.00	0.00	0	129.97	0.00	0.00	0	0.00	129.97	1074.76	129.97
188	IL Experiment - Elderly	PL-Animal 3	PL-Animal 3-8	2019/7/13 20:15:42	23689.03	166.81	142.01	45.17	0.00	0	166.81	0	179.38	0	166.81	0	166.81	1223.88	12.50	97.89	3	130.60	5.00	0.00	3	3.50	130.10	3008.93	33.87	88.85	4	79.87	13.00	0.00	4	3.60	78.87	2381.65	21.80	109.25	6	34.53	7.00	0.00	5	4.67	32.03	2664.81	8.17
189	IL Experiment - Elderly	PL-Animal 3	PL-Animal 3-9	2019/7/13 20:20:00	12929.93	163.74	78.97	83.84	1.50	0	163.74	0	177.58	0	163.74	0	163.74	1184.04	20.40	58.04	2	13.83	9.53	1.00	2	1.90	13.33	235.11	4.67	50.38	1	66.03	2.50	0.00	2	3.07	48.20	2071.86	30.37	68.22	3	83.57	16.93	0.00	3	3.73	100.37	3134.44	22.73
190	IL Experiment - Elderly	PL-Animal 3	PL-Animal 3-10	2019/7/13 20:24:15	11263.03	174.34	64.60	98.40	5.00	0	174.34	0	181.41	0	174.34	0	174.34	611.87	30.07	20.35	2	31.07	25.50	0.00	1	3.50	3.00	214.90	6.57	32.73	1	94.77	3.97	0.00	0	0.00	174.34	1469.23	29.24	50.25	2	117.30	12.97	5.00	4	4.27	115.80	2937.88	44.23
191	IL Experiment - Elderly	PL-Animal 3	PL-Animal 3-11	2019/7/13 20:28:36	9713.07	147.40	65.89	87.07	0.00	0	147.40	0	147.44	0	147.40	0	147.40	821.42	12.00	68.45	3	40.53	5.50	0.00	2	4.00	84.13	553.21	5.00	110.64	2	75.63	1.00	0.00	0	0.00	147.40	1173.01	5.00	234.58	3	80.63	0.00	0.00	2	1.00	136.63	2672.09	38.43
192	IL Experiment - Elderly	PL-Animal 3	PL-Animal 3-12	2019/7/13 20:32:10	13288.89	238.46	55.73	149.11	0.00	0	238.46	0	241.02	0	238.46	0	238.46	277.49	3.60	77.08	2	62.63	1.00	0.00	4	10.00	22.27	166.55	2.50	66.61	1	170.81	1.00	0.00	2	1.50	137.53	710.55	9.40	75.59	4	74.13	4.00	0.00	4	7.50	70.13	4458.29	54.88
193	IL Experiment - Elderly	PL-Animal 3	PL-Animal 3-13	2019/7/13 20:37:54	35182.27	335.03	105.01	123.43	0.00	0	335.03	0	354.93	0	335.03	0	335.03	2600.67	43.86	59.29	5	116.83	21.00	0.00	5	13.00	39.87	1354.36	23.64	57.30	4	236.55	13.00	0.00	3	4.50	145.10	694.98	6.00	115.83	3	0.00	1.50	0.00	2	2.50	82.30	8934.10	87.87
194	IL Experiment - Elderly	PL-Animal 3	PL-Animal 3-14	2019-07-16 16:51:12	4701.91	144.97	32.43	5.50	121.97	0	144.97	0	145.47	0	144.97	0	144.97	0.00	0.00	0.00	0	144.97	0.00	0.00	0	0.00	144.97	228.06	1.50	152.04	1	28.00	0.00	0.00	0	0.00	144.97	0.00	0.00	0.00	0	144.97	0.00	0.00	0	0.00	144.97	0.00	0.00
195	IL Experiment - Elderly	PL-Animal 3	PL-Animal 3-15	2019/7/13 20:49:50	11016.33	20.97	525.42	14.97	0.00	0	20.97	0	21.00	0	20.97	0	20.97	0.00	0.00	0.00	0	20.97	0.00	0.00	0	0.00	20.97	0.00	0.00	0.00	0	20.97	0.00	0.00	0	0.00	20.97	0.00	0.00	0.00	0	20.97	0.00	0.00	0	0.00	20.97	6707.71	15.00
196	IL Experiment - Elderly	PL-Animal 3	PL-Animal 3-16	2019/7/14 17:29:40	8672.41	157.17	55.18	103.00	0.00	514	0.00	515	0.00	514	0.00	514	0.00	0.00	0.00	0.00	0	157.17	0.00	0.00	1	0.50	163.27	0.00	0.00	0.00	0	157.17	0.00	0.00	0	0.00	157.17	146.61	2.00	73.31	1	109.63	0.00	0.00	8	12.50	1.97	1916.91	13.60
197	IL Experiment - Elderly	PL-Animal 3	PL-Animal 3-17	2019/7/14 17:36:13	7483.05	63.40	118.03	27.50	1.50	472	0.00	472	0.00	472	0.00	472	0.00	0.00	0.00	0.00	0	63.40	0.00	0.00	1	0.87	69.13	0.00	0.00	0.00	0	63.40	0.00	0.00	0	0.00	63.40	0.00	0.00	0.00	0	63.40	0.00	0.00	2	3.00	2.90	1840.78	10.60
198	IL Experiment - Elderly	PL-Animal 3	PL-Animal 3-18	2019/7/14 17:39:38	7574.45	98.04	77.26	58.43	0.00	486	0.00	486	0.00	486	0.00	486	0.00	0.00	0.00	0.00	0	98.04	0.00	0.00	0	0.00	98.04	0.00	0.00	0.00	0	98.04	0.00	0.00	0	0.00	98.04	0.00	0.00	0.00	0	98.04	0.00	0.00	0	0.00	98.04	1922.32	10.40
199	IL Experiment - Elderly	PL-Animal 4	PL-Animal 4-1	2019/7/12 14:39:41	1482.72	39.47	37.57	25.97	2.00	244	0.00	244	0.00	243	0.00	243	0.00	0.00	0.00	0.00	0	39.47	0.00	0.00	0	0.00	39.47	0.00	0.00	0.00	0	39.47	0.00	0.00	0	0.00	39.47	0.00	0.00	0.00	0	39.47	0.00	0.00	0	0.00	39.47	1138.08	29.50
200	IL Experiment - Elderly	PL-Animal 4	PL-Animal 4-2	2019/7/12 14:40:41	2632.15	30.40	86.58	11.00	1.00	235	0.00	236	0.00	235	0.00	235	0.00	1065.04	19.33	55.09	2	4.10	9.50	1.00	2	1.50	9.93	0.00	0.00	0.00	0	30.40	0.00	0.00	0	0.00	30.40	0.00	0.00	0.00	0	30.40	0.00	0.00	0	0.00	30.40	1341.00	9.07
201	IL Experiment - Elderly	PL-Animal 4	PL-Animal 4-3	2019/7/12 14:41:28	2833.46	26.03	108.84	12.50	0.00	247	0.00	247	0.00	247	0.00	247	0.00	339.35	12.00	28.28	2	0.00	9.00	0.00	1	0.50	13.57	0.00	0.00	0.00	0	26.03	0.00	0.00	0	0.00	26.03	0.00	0.00	0.00	0	26.03	0.00	0.00	0	0.00	26.03	1849.81	10.50
202	IL Experiment - Elderly	PL-Animal 4	PL-Animal 4-4	2019/7/12 17:16:20	59365.61	224.49	264.45	145.98	5.00	244	0.00	-1369297434	-0.00	243	0.00	243	0.00	5620.51	8.50	661.25	2	110.00	3.50	0.00	1	3.00	9.50	0.00	0.00	0.00	0	224.49	0.00	0.00	0	0.00	224.49	518.23	4.50	115.15	2	122.50	0.50	0.00	2	6.00	119.00	4197.96	109.47
203	IL Experiment - Elderly	PL-Animal 4	PL-Animal 4-5	2019/7/12 17:21:41	50980.67	242.99	209.81	126.98	4.00	245	0.00	-1362678453	-0.00	245	0.00	-1361236671	-0.00	4281.22	14.00	305.78	4	60.00	5.50	0.00	3	7.00	10.50	449.48	8.50	52.87	1	133.00	4.50	0.00	1	0.50	141.50	2759.25	18.50	149.14	5	67.50	6.00	1.50	5	5.00	66.50	4365.12	71.97
204	IL Experiment - Elderly	PL-Animal 4	PL-Animal 4-6	2019/7/12 17:27:28	11385.95	101.47	112.22	53.47	4.50	-1364579154	-0.00	247	0.00	247	0.00	247	0.00	2128.56	6.50	327.48	2	17.50	1.50	0.00	4	4.50	16.00	0.00	0.00	0.00	0	101.47	0.00	0.00	1	2.50	60.50	640.66	4.00	160.17	2	64.50	0.00	0.00	1	1.50	89.00	1239.26	40.47
205	IL Experiment - Elderly	PL-Animal 4	PL-Animal 4-7	2019/7/12 17:29:55	7155.37	73.47	97.40	47.47	0.00	235	0.00	-1469763607	-0.00	235	0.00	-1469894681	-0.00	1232.13	3.00	410.72	1	40.50	0.00	0.00	2	7.47	0.53	0.00	0.00	0.00	0	73.47	0.00	0.00	0	0.00	73.47	588.08	4.00	147.02	2	67.50	0.50	0.00	1	2.00	65.50	1406.39	39.97
206	IL Experiment - Elderly	PL-Animal 4	PL-Animal 4-8	2019/7/13 21:11:27	32880.35	115.47	284.76	77.47	0.00	0	115.47	0	115.50	0	115.47	0	115.47	0.00	0.00	0.00	0	115.47	0.00	0.00	0	0.00	115.47	0.00	0.00	0.00	0	115.47	0.00	0.00	0	0.00	115.47	1794.79	16.50	108.78	3	58.50	7.00	0.00	1	2.00	104.50	0.00	0.00
207	IL Experiment - Elderly	PL-Animal 4	PL-Animal 4-9	2019/7/13 21:14:16	31947.12	54.97	581.21	25.00	0.00	0	54.97	0	55.00	0	54.97	0	54.97	780.11	10.00	78.01	3	2.50	3.50	0.00	1	2.00	35.50	0.00	0.00	0.00	0	54.97	0.00	0.00	0	0.00	54.97	1032.30	3.00	344.10	2	46.00	0.00	0.00	1	1.00	45.00	18869.23	15.97
208	IL Experiment - Elderly	PL-Animal 4	PL-Animal 4-10	2019/7/13 21:15:39	59620.15	170.47	349.73	77.97	1.50	0	170.47	0	170.51	0	170.47	0	170.47	1062.59	7.50	141.68	2	85.00	1.50	0.00	2	4.00	84.00	1821.49	27.00	67.46	4	73.50	12.00	0.00	3	4.00	72.50	4463.91	31.50	141.71	7	35.00	18.50	1.50	5	5.00	67.50	288.43	1.50
209	IL Experiment - Elderly	PL-Animal 4	PL-Animal 4-11	2019/7/13 21:19:45	22784.80	93.47	243.78	80.97	0.00	0	93.47	0	93.50	0	93.47	0	93.47	0.00	0.00	0.00	0	93.47	0.00	0.00	0	0.00	93.47	0.00	0.00	0.00	0	93.47	0.00	0.00	0	0.00	93.47	938.95	4.50	208.66	1	33.00	2.00	0.00	1	1.50	31.50	0.00	0.00
210	IL Experiment - Elderly	PL-Animal 4	PL-Animal 4-12	2019/7/13 21:22:03	10414.43	56.80	183.35	33.00	0.00	0	56.80	0	63.80	0	56.80	0	56.80	462.37	3.50	132.11	2	43.53	0.00	0.00	2	2.50	38.03	0.00	0.00	0.00	0	56.80	0.00	0.00	0	0.00	56.80	645.79	5.50	117.42	2	39.53	1.50	0.00	0	0.00	56.80	0.00	0.00
211	IL Experiment - Elderly	PL-Animal 4	PL-Animal 4-13	2019/7/13 21:23:39	13252.21	50.00	265.05	7.10	0.00	0	50.00	0	141.03	0	50.00	0	50.00	1576.43	5.80	271.80	3	1.63	2.00	0.00	0	0.00	50.00	335.21	3.80	88.22	1	91.50	1.50	0.00	1	2.23	112.77	92.19	0.60	153.62	1	133.40	0.00	0.00	0	0.00	50.00	5663.79	22.20
212	IL Experiment - Elderly	PL-Animal 4	PL-Animal 4-14	2019-07-16 16:54:43	23974.18	111.13	215.73	32.83	0.50	0	111.13	0	149.37	0	111.13	0	111.13	2520.82	14.30	176.28	4	6.80	6.50	0.00	0	0.00	111.13	655.81	12.60	52.05	3	19.00	10.00	0.00	4	5.80	18.27	753.17	6.27	120.18	4	112.00	0.00	0.00	3	2.23	115.00	11002.14	28.60
213	IL Experiment - Elderly	PL-Animal 4	PL-Animal 4-15	2019/7/13 21:31:36	4092.48	8.40	487.20	0.50	0.00	0	8.40	0	232.62	0	8.40	0	8.40	0.00	0.00	0.00	0	8.40	0.00	0.00	0	0.00	8.40	0.00	0.00	0.00	0	8.40	0.00	0.00	0	0.00	8.40	165.35	1.17	141.73	1	23.10	0.00	0.00	1	0.73	22.37	1243.25	1.37
214	IL Experiment - Elderly	PL-Animal 4	PL-Animal 4-16	2019/7/14 17:49:00	37732.07	291.68	129.36	79.04	0.00	444	0.00	444	0.00	444	0.00	444	0.00	2022.96	26.00	77.79	6	122.53	12.00	0.00	6	5.50	127.53	3374.07	18.97	177.89	10	32.43	1.00	0.00	5	6.27	41.07	3852.92	43.46	88.65	14	5.83	16.63	0.00	6	4.77	10.23	2989.87	24.50
215	IL Experiment - Elderly	PL-Animal 4	PL-Animal 4-17	2019/7/14 17:56:23	18242.25	107.50	169.70	27.50	0.50	474	0.00	474	0.00	474	0.00	474	0.00	430.89	7.00	61.56	1	114.60	3.00	0.00	0	0.00	107.50	456.61	4.03	113.21	2	25.70	2.00	0.00	2	4.50	21.13	1575.42	16.47	95.67	4	13.37	7.50	0.00	3	2.07	12.87	459.79	1.50
216	IL Experiment - Elderly	PL-Animal 4	PL-Animal 4-18	2019/7/14 17:59:24	10636.77	62.17	171.10	15.50	0.00	494	0.00	494	0.00	494	0.00	494	0.00	458.68	7.00	65.53	1	55.73	3.00	0.00	0	0.00	62.17	267.44	3.20	83.58	2	33.80	0.50	0.00	1	1.37	32.43	465.70	8.50	54.79	2	23.13	5.00	0.00	2	3.53	29.23	798.77	7.00
217	IL Experiment - Elderly	PL-Animal 5	PL-Animal 5-1	2019/7/12 14:42:09	2699.69	75.37	35.82	47.60	4.00	250	0.00	250	0.00	250	0.00	250	0.00	221.34	8.00	27.67	1	29.90	5.00	1.00	1	5.97	0.53	0.00	0.00	0.00	0	75.37	0.00	0.00	0	0.00	75.37	0.00	0.00	0.00	0	75.37	0.00	0.00	0	0.00	75.37	2419.13	66.87
218	IL Experiment - Elderly	PL-Animal 5	PL-Animal 5-2	2019/7/12 14:43:59	9133.11	101.13	90.31	37.50	2.50	248	0.00	248	0.00	248	0.00	248	0.00	2525.69	40.50	62.36	6	6.70	19.00	2.00	1	1.00	36.10	0.00	0.00	0.00	0	101.13	0.00	0.00	0	0.00	101.13	0.00	0.00	0.00	0	101.13	0.00	0.00	0	0.00	101.13	4209.11	34.67
219	IL Experiment - Elderly	PL-Animal 5	PL-Animal 5-3	2019/7/12 14:46:27	1706.37	11.67	146.26	2.50	0.50	242	0.00	242	0.00	242	0.00	242	0.00	334.83	1.97	170.25	1	10.40	0.50	0.50	0	0.00	11.67	0.00	0.00	0.00	0	11.67	0.00	0.00	0	0.00	11.67	0.00	0.00	0.00	0	11.67	0.00	0.00	0	0.00	11.67	1300.76	9.20
220	IL Experiment - Elderly	PL-Animal 5	PL-Animal 5-4	2019/7/12 17:31:43	70483.35	324.98	216.89	234.51	0.00	239	0.00	239	0.00	-1464914221	-0.00	239	0.00	2522.32	7.50	336.31	3	49.50	2.50	0.00	5	16.00	45.50	793.44	9.00	88.16	1	62.00	3.50	0.00	2	16.50	174.51	965.12	8.50	113.54	2	112.50	2.00	0.00	1	1.00	118.00	30228.84	93.47
221	IL Experiment - Elderly	PL-Animal 5	PL-Animal 5-5	2019/7/12 17:39:25	21700.24	131.80	164.65	117.50	0.00	-1422317507	-0.00	232	0.00	232	0.00	232	0.00	0.00	0.00	0.00	0	131.80	0.00	0.00	1	1.00	5.33	667.28	91.50	7.29	1	32.33	90.50	0.00	0	0.00	131.80	0.00	0.00	0.00	0	131.80	0.00	0.00	0	0.00	131.80	5016.51	11.80
222	IL Experiment - Elderly	PL-Animal 5	PL-Animal 5-6	2019/7/12 17:42:36	13295.38	180.48	73.67	169.48	0.00	228	0.00	228	0.00	228	0.00	-1435883026	-0.00	958.82	2.00	479.40	1	9.50	0.00	0.00	1	1.50	10.00	0.00	0.00	0.00	0	180.48	0.00	0.00	0	0.00	180.48	0.00	0.00	0.00	0	180.48	0.00	0.00	0	0.00	180.48	12336.56	178.48
223	IL Experiment - Elderly	PL-Animal 5	PL-Animal 5-7	2019/7/12 17:46:55	4961.04	21.87	226.88	5.00	0.00	231	0.00	-1420154658	-0.00	231	0.00	231	0.00	0.00	0.00	0.00	0	21.87	0.00	0.00	0	0.00	21.87	72.21	1.50	48.14	1	17.67	1.00	0.00	2	1.50	8.50	0.00	0.00	0.00	0	21.87	0.00	0.00	0	0.00	21.87	2253.25	5.97
224	IL Experiment - Elderly	PL-Animal 5	PL-Animal 5-8	2019/7/13 22:01:56	60605.41	208.98	290.00	155.48	0.00	0	208.98	0	209.02	0	208.98	0	208.98	12351.52	78.01	158.34	1	79.00	71.01	0.00	3	2.50	78.00	714.14	14.00	51.01	3	56.50	6.00	0.00	1	1.00	61.50	1318.73	13.50	97.66	3	163.01	3.00	0.00	2	8.00	154.50	0.00	0.00
225	IL Experiment - Elderly	PL-Animal 5	PL-Animal 5-9	2019/7/13 22:06:57	4649.72	138.97	33.46	136.47	0.00	0	138.97	0	139.13	0	138.97	0	138.97	0.00	0.00	0.00	0	138.97	0.00	0.00	0	0.00	138.97	0.00	0.00	0.00	0	138.97	0.00	0.00	0	0.00	138.97	0.00	0.00	0.00	0	138.97	0.00	0.00	0	0.00	138.97	0.00	0.00
226	IL Experiment - Elderly	PL-Animal 5	PL-Animal 5-10	2019/7/13 22:10:18	10952.76	128.47	85.26	126.47	0.00	0	128.47	0	128.50	0	128.47	0	128.47	0.00	0.00	0.00	0	128.47	0.00	0.00	0	0.00	128.47	0.00	0.00	0.00	0	128.47	0.00	0.00	0	0.00	128.47	0.00	0.00	0.00	0	128.47	0.00	0.00	0	0.00	128.47	0.00	0.00
227	IL Experiment - Elderly	PL-Animal 5	PL-Animal 5-11	2019/7/13 22:13:26	4210.78	176.48	23.86	173.47	0.00	0	176.48	0	176.98	0	176.48	0	176.48	0.00	0.00	0.00	0	176.48	0.00	0.00	0	0.00	176.48	0.00	0.00	0.00	0	176.48	0.00	0.00	0	0.00	176.48	0.00	0.00	0.00	0	176.48	0.00	0.00	0	0.00	176.48	0.00	0.00
228	IL Experiment - Elderly	PL-Animal 5	PL-Animal 5-12	2019/7/13 22:17:42	3552.95	59.47	59.75	58.47	0.00	0	59.47	0	59.90	0	59.47	0	59.47	0.00	0.00	0.00	0	59.47	0.00	0.00	0	0.00	59.47	0.00	0.00	0.00	0	59.47	0.00	0.00	0	0.00	59.47	0.00	0.00	0.00	0	59.47	0.00	0.00	0	0.00	59.47	0.00	0.00
229	IL Experiment - Elderly	PL-Animal 5	PL-Animal 5-13	2019/7/13 22:19:13	2435.02	2.90	839.67	0.00	0.00	0	2.90	0	49.30	0	2.90	0	2.90	0.00	0.00	0.00	0	2.90	0.00	0.00	0	0.00	2.90	0.00	0.00	0.00	0	2.90	0.00	0.00	0	0.00	2.90	0.00	0.00	0.00	0	2.90	0.00	0.00	0	0.00	2.90	0.00	0.00
230	IL Experiment - Elderly	PL-Animal 5	PL-Animal 5-14	2019-07-16 16:58:21	6062.55	25.50	237.75	3.00	0.00	0	25.50	0	125.57	0	25.50	0	25.50	922.38	7.40	124.65	2	1.03	2.50	0.00	0	0.00	25.50	0.00	0.00	0.00	0	25.50	0.00	0.00	0	0.00	25.50	123.47	0.93	132.30	1	17.27	0.00	0.00	3	3.37	13.20	884.72	3.50
231	IL Experiment - Elderly	PL-Animal 5	PL-Animal 5-15	2019/7/13 22:23:38	13071.82	34.40	380.00	30.47	0.00	0	34.40	0	134.93	0	34.40	0	34.40	0.00	0.00	0.00	0	34.40	0.00	0.00	0	0.00	34.40	0.00	0.00	0.00	0	34.40	0.00	0.00	0	0.00	34.40	0.00	0.00	0.00	0	34.40	0.00	0.00	0	0.00	34.40	0.00	0.00
232	IL Experiment - Elderly	PL-Animal 5	PL-Animal 5-16	2019/7/14 18:01:00	9695.52	61.13	158.60	20.60	0.00	440	0.00	440	0.00	440	0.00	440	0.00	760.55	11.00	69.14	2	56.13	6.50	0.00	1	1.00	57.63	604.00	8.00	75.50	2	43.63	3.00	0.00	1	1.00	42.63	2066.20	9.50	217.50	5	3.17	2.73	0.00	2	4.00	15.90	139.38	1.50
233	IL Experiment - Elderly	PL-Animal 5	PL-Animal 5-17	2019/7/14 18:05:04	12564.07	75.47	166.49	10.53	0.00	452	0.00	452	0.00	452	0.00	452	0.00	945.24	9.50	99.50	2	71.27	2.50	0.00	0	0.00	75.47	0.00	0.00	0.00	0	75.47	0.00	0.00	1	3.83	34.60	764.03	6.00	127.34	4	2.10	0.00	0.00	1	1.50	67.77	165.42	0.50
234	IL Experiment - Elderly	PL-Animal 5	PL-Animal 5-18	2019/7/14 18:07:12	17477.91	108.33	161.34	24.23	0.00	448	0.00	448	0.00	448	0.00	448	0.00	1268.68	19.57	64.84	5	40.10	7.50	0.00	2	1.83	110.63	843.01	10.00	84.30	2	51.87	4.50	0.00	1	2.00	49.87	1008.41	9.30	108.43	3	2.23	0.50	0.00	2	2.47	7.27	4684.02	19.13
235	IL Experiment - Elderly	PL-Animal 6	PL-Animal 6-1	2019/7/12 14:46:50	7795.32	93.20	83.64	51.53	5.00	252	0.00	252	0.00	251	0.00	251	0.00	727.99	15.37	47.38	3	40.87	6.50	0.50	3	6.50	2.50	311.92	0.50	623.85	1	81.37	0.00	0.00	0	0.00	93.20	0.00	0.00	0.00	0	93.20	0.00	0.00	0	0.00	93.20	3121.53	71.83
236	IL Experiment - Elderly	PL-Animal 6	PL-Animal 6-2	2019/7/12 14:49:06	5593.46	113.30	49.37	61.70	2.50	228	0.00	228	0.00	228	0.00	228	0.00	209.61	8.00	26.20	1	41.63	5.00	1.00	2	8.00	15.50	0.00	0.00	0.00	0	113.30	0.00	0.00	1	2.00	105.33	721.13	17.50	41.21	1	56.13	9.50	0.00	1	1.50	54.63	2522.09	42.90
237	IL Experiment - Elderly	PL-Animal 6	PL-Animal 6-3	2019/7/12 14:51:50	7879.92	136.10	57.90	61.40	14.00	245	0.00	245	0.00	245	0.00	245	0.00	141.56	3.00	47.19	1	14.50	1.50	0.00	0	0.00	136.10	1268.77	28.00	45.31	1	103.63	15.50	5.50	1	1.00	102.63	2544.78	48.27	52.72	6	17.50	25.27	3.50	1	1.50	68.90	186.80	3.50
238	IL Experiment - Elderly	PL-Animal 6	PL-Animal 6-4	2019/7/12 17:47:31	9910.68	175.18	56.58	81.00	14.00	237	0.00	237	0.00	-1463144626	-0.00	237	0.00	292.80	7.00	41.83	2	10.50	3.50	0.00	2	4.50	7.00	0.00	0.00	0.00	0	175.18	0.00	0.00	0	0.00	175.18	376.87	6.50	57.97	3	131.63	3.00	0.00	7	6.50	130.13	1067.75	15.47
239	IL Experiment - Elderly	PL-Animal 6	PL-Animal 6-5	2019/7/12 17:51:42	5444.98	55.27	98.52	21.77	0.00	240	0.00	240	0.00	240	0.00	-1456329162	-0.00	821.61	12.23	67.16	2	4.00	6.73	0.00	2	1.50	3.00	410.62	9.00	45.63	2	34.80	4.50	0.00	1	1.00	48.80	0.00	0.00	0.00	0	55.27	0.00	0.00	0	0.00	55.27	2077.62	8.40
240	IL Experiment - Elderly	PL-Animal 6	PL-Animal 6-6	2019/7/12 17:53:05	5688.13	46.40	122.59	15.50	0.50	250	0.00	250	0.00	-1349377130	-0.00	250	0.00	473.45	4.50	105.21	2	1.50	1.00	0.00	2	1.00	1.00	933.48	17.50	53.34	3	17.73	9.50	0.50	0	0.00	46.40	0.00	0.00	0.00	0	46.40	0.00	0.00	0	0.00	46.40	2055.93	8.70
241	IL Experiment - Elderly	PL-Animal 6	PL-Animal 6-7	2019/7/12 17:54:15	5014.75	27.77	180.60	2.50	0.00	256	0.00	-1391844850	-0.00	256	0.00	256	0.00	0.00	0.00	0.00	0	27.77	0.00	0.00	0	0.00	27.77	0.00	0.00	0.00	0	27.77	0.00	0.00	0	0.00	27.77	0.00	0.00	0.00	0	27.77	0.00	0.00	0	0.00	27.77	2063.33	6.90
242	IL Experiment - Elderly	PL-Animal 6	PL-Animal 6-8	2019/7/13 22:39:34	4911.35	144.47	34.00	134.47	0.00	0	144.47	0	144.50	0	144.47	0	144.47	0.00	0.00	0.00	0	144.47	0.00	0.00	0	0.00	144.47	0.00	0.00	0.00	0	144.47	0.00	0.00	0	0.00	144.47	1210.87	126.50	9.57	2	17.50	124.00	0.00	2	4.50	14.00	0.00	0.00
243	IL Experiment - Elderly	PL-Animal 6	PL-Animal 6-9	2019/7/13 22:43:04	35206.37	192.98	182.44	147.48	0.00	0	192.98	0	193.01	0	192.98	0	192.98	3006.30	30.00	100.21	1	4.50	28.50	0.00	0	0.00	192.98	8720.10	16.50	528.50	1	83.50	14.50	0.00	1	2.50	67.00	7743.05	69.01	112.20	4	35.00	56.51	0.00	3	4.97	0.53	0.00	0.00
244	IL Experiment - Elderly	PL-Animal 6	PL-Animal 6-10	2019/7/13 22:47:42	19978.85	34.97	571.37	23.47	0.00	0	34.97	0	35.33	0	34.97	0	34.97	1930.39	4.50	428.98	1	16.00	3.50	0.00	0	0.00	34.97	0.00	0.00	0.00	0	34.97	0.00	0.00	0	0.00	34.97	0.00	0.00	0.00	0	34.97	0.00	0.00	0	0.00	34.97	0.00	0.00
245	IL Experiment - Elderly	PL-Animal 6	PL-Animal 6-11	2019/7/13 22:48:38	63569.21	98.97	642.34	61.47	0.00	0	98.97	0	99.47	0	98.97	0	98.97	0.00	0.00	0.00	0	98.97	0.00	0.00	0	0.00	98.97	6029.31	3.00	2009.80	1	72.50	0.50	0.00	1	1.00	71.50	1620.94	10.50	154.38	2	13.00	8.50	0.00	2	3.50	13.50	0.00	0.00
246	IL Experiment - Elderly	PL-Animal 6	PL-Animal 6-12	2019/7/13 22:51:05	10163.26	176.08	57.72	165.08	0.00	0	176.08	0	176.11	0	176.08	0	176.08	0.00	0.00	0.00	0	176.08	0.00	0.00	0	0.00	176.08	196.75	1.00	196.75	1	10.00	0.00	0.00	1	1.00	9.00	0.00	0.00	0.00	0	176.08	0.00	0.00	0	0.00	176.08	0.00	0.00
247	IL Experiment - Elderly	PL-Animal 6	PL-Animal 6-13	2019/7/13 22:55:19	4773.96	66.63	71.65	39.00	0.00	0	66.63	0	233.75	0	66.63	0	66.63	615.94	2.97	207.62	1	35.60	1.50	0.00	0	0.00	66.63	0.00	0.00	0.00	0	66.63	0.00	0.00	0	0.00	66.63	0.00	0.00	0.00	0	66.63	0.00	0.00	0	0.00	66.63	1259.54	4.20
248	IL Experiment - Elderly	PL-Animal 6	PL-Animal 6-14	2019-07-16 17:01:25	6641.73	17.10	388.41	1.00	0.00	0	17.10	0	25.50	0	17.10	0	17.10	421.34	3.00	140.45	1	2.47	0.00	0.00	1	1.00	1.47	0.00	0.00	0.00	0	17.10	0.00	0.00	0	0.00	17.10	0.00	0.00	0.00	0	17.10	0.00	0.00	0	0.00	17.10	743.48	1.93
249	IL Experiment - Elderly	PL-Animal 6	PL-Animal 6-15	2019/7/13 23:01:38	6827.80	41.10	166.13	13.50	0.00	0	41.10	0	176.21	0	41.10	0	41.10	1789.84	0.93	1917.70	2	3.37	0.00	0.00	0	0.00	41.10	83.08	0.50	166.16	1	26.03	0.00	0.00	0	0.00	41.10	0.00	0.00	0.00	0	41.10	0.00	0.00	1	1.50	28.03	0.00	0.00
250	IL Experiment - Elderly	PL-Animal 6	PL-Animal 6-16	2019/7/14 18:11:54	21564.79	110.10	195.86	19.37	0.00	464	0.00	464	0.00	464	0.00	464	0.00	1152.54	7.30	157.86	3	86.80	0.50	0.00	4	4.33	147.17	0.00	0.00	0.00	0	110.10	0.00	0.00	0	0.00	110.10	1353.30	12.80	105.73	3	3.80	3.00	0.00	2	4.10	7.33	1517.82	13.00
251	IL Experiment - Elderly	PL-Animal 6	PL-Animal 6-17	2019/7/14 18:16:11	2386.44	18.37	129.93	6.00	0.00	462	0.00	462	0.00	462	0.00	462	0.00	0.00	0.00	0.00	0	18.37	0.00	0.00	1	1.50	15.57	0.00	0.00	0.00	0	18.37	0.00	0.00	0	0.00	18.37	383.66	7.50	51.15	1	5.13	4.00	0.00	0	0.00	18.37	951.56	5.93
252	IL Experiment - Elderly	PL-Animal 6	PL-Animal 6-18	2019/7/14 18:16:47	29325.61	105.30	278.49	8.50	0.00	492	0.00	492	0.00	492	0.00	492	0.00	0.00	0.00	0.00	0	105.30	0.00	0.00	1	2.27	80.23	375.29	1.50	250.20	1	122.87	0.00	0.00	0	0.00	105.30	2373.18	19.73	120.26	8	2.50	3.50	0.00	5	5.97	5.00	1294.98	8.23
253	IL Experiment - Elderly	PL-Animal 7	PL-Animal 7-1	2019/7/12 14:55:05	2393.50	70.97	33.73	48.00	1.00	0	0.00	0	0.00	0	0.00	0	0.00	881.57	25.00	35.26	1	43.00	17.50	0.00	1	3.00	2.50	0.00	0.00	0.00	0	70.97	0.00	0.00	0	0.00	70.97	0.00	0.00	0.00	0	70.97	0.00	0.00	0	0.00	70.97	951.28	33.00
254	IL Experiment - Elderly	PL-Animal 7	PL-Animal 7-2	2019/7/12 14:56:49	2921.54	34.00	85.93	15.00	0.50	239	0.00	239	0.00	239	0.00	239	0.00	327.21	4.00	81.80	1	21.03	0.50	0.00	2	4.00	7.03	0.00	0.00	0.00	0	34.00	0.00	0.00	0	0.00	34.00	0.00	0.00	0.00	0	34.00	0.00	0.00	0	0.00	34.00	1387.76	20.50
255	IL Experiment - Elderly	PL-Animal 7	PL-Animal 7-3	2019/7/12 14:57:42	1846.13	27.90	66.17	12.47	0.00	231	0.00	231	0.00	231	0.00	231	0.00	391.96	5.40	72.59	1	19.53	1.50	0.00	2	4.00	1.50	0.00	0.00	0.00	0	27.90	0.00	0.00	0	0.00	27.90	0.00	0.00	0.00	0	27.90	0.00	0.00	0	0.00	27.90	871.74	10.97
256	IL Experiment - Elderly	PL-Animal 7	PL-Animal 7-4	2019/7/12 17:54:59	6883.61	91.07	75.59	43.00	0.00	253	0.00	253	0.00	253	0.00	-1394990242	-0.00	692.75	5.67	122.25	2	3.50	1.50	0.00	1	1.00	2.50	782.41	6.47	120.99	1	41.43	4.00	0.00	1	2.50	15.93	278.93	4.50	61.99	1	72.93	2.00	0.00	0	0.00	91.07	521.28	6.50
257	IL Experiment - Elderly	PL-Animal 7	PL-Animal 7-5	2019/7/12 17:57:17	4523.11	68.30	66.22	31.97	0.50	255	0.00	-1398725979	-0.00	255	0.00	-1396759901	-0.00	765.06	11.50	66.53	2	9.83	5.00	0.50	2	6.00	7.33	715.54	7.00	102.22	3	31.83	1.50	0.00	1	1.50	30.33	0.00	0.00	0.00	0	68.30	0.00	0.00	0	0.00	68.30	291.27	14.00
258	IL Experiment - Elderly	PL-Animal 7	PL-Animal 7-6	2019/7/12 17:58:58	3030.80	24.47	123.87	4.97	0.00	474	0.00	474	0.00	474	0.00	474	0.00	413.60	3.00	137.87	1	1.50	0.00	0.00	1	0.50	1.00	1110.38	8.00	138.80	2	9.00	0.00	0.00	1	2.50	6.50	0.00	0.00	0.00	0	24.47	0.00	0.00	0	0.00	24.47	282.41	2.97
259	IL Experiment - Elderly	PL-Animal 7	PL-Animal 7-7	2019/7/12 17:59:38	3022.71	25.53	118.38	6.50	0.00	472	0.00	472	0.00	472	0.00	472	0.00	538.63	4.07	132.45	1	7.00	1.00	0.00	2	2.50	5.50	681.50	3.00	227.17	1	20.57	0.00	0.00	1	2.00	18.57	0.00	0.00	0.00	0	25.53	0.00	0.00	0	0.00	25.53	183.95	2.50
260	IL Experiment - Elderly	PL-Animal 7	PL-Animal 7-8	2019/7/14 12:42:04	45464.65	98.47	461.73	57.50	0.00	496	0.00	496	0.00	496	0.00	496	0.00	0.00	0.00	0.00	0	98.47	0.00	0.00	0	0.00	98.47	6676.91	3.00	2225.67	2	26.50	0.00	0.00	0	0.00	98.47	5206.86	48.00	108.48	4	36.00	35.00	0.00	4	4.50	36.50	23733.46	21.00
261	IL Experiment - Elderly	PL-Animal 7	PL-Animal 7-9	2019/7/14 12:44:30	26376.16	60.47	436.21	37.47	0.00	486	0.00	486	0.00	486	0.00	486	0.00	0.00	0.00	0.00	0	60.47	0.00	0.00	0	0.00	60.47	0.00	0.00	0.00	0	60.47	0.00	0.00	0	0.00	60.47	0.00	0.00	0.00	0	60.47	0.00	0.00	0	0.00	60.47	0.00	0.00
262	IL Experiment - Elderly	PL-Animal 7	PL-Animal 7-10	2019/7/14 12:46:01	1415.02	0.47	3032.19	0.00	0.00	444	0.00	444	0.00	444	0.00	444	0.00	0.00	0.00	0.00	0	0.47	0.00	0.00	0	0.00	0.47	0.00	0.00	0.00	0	0.47	0.00	0.00	0	0.00	0.47	0.00	0.00	0.00	0	0.47	0.00	0.00	0	0.00	0.47	0.00	0.00
263	IL Experiment - Elderly	PL-Animal 7	PL-Animal 7-11	2019/7/14 12:46:09	22978.94	64.97	353.71	25.97	0.00	488	0.00	488	0.00	488	0.00	488	0.00	92.13	0.50	184.26	1	25.00	0.00	0.00	1	5.50	11.00	0.00	0.00	0.00	0	64.97	0.00	0.00	1	3.00	49.00	650.49	11.00	59.14	4	27.00	6.50	0.00	2	3.00	32.00	5259.64	2.00
264	IL Experiment - Elderly	PL-Animal 7	PL-Animal 7-12	2019/7/14 12:47:47	2496.00	27.47	90.87	18.97	0.00	484	0.00	484	0.00	484	0.00	484	0.00	0.00	0.00	0.00	0	27.47	0.00	0.00	0	0.00	27.47	0.00	0.00	0.00	0	27.47	0.00	0.00	0	0.00	27.47	0.00	0.00	0.00	0	27.47	0.00	0.00	0	0.00	27.47	0.00	0.00
265	IL Experiment - Elderly	PL-Animal 7	PL-Animal 7-13	2019/7/14 12:48:32	11870.33	52.47	226.25	27.47	0.00	498	0.00	498	0.00	498	0.00	498	0.00	804.59	10.50	76.63	2	27.00	3.00	0.00	1	3.00	24.00	3528.27	3.50	1008.09	2	39.50	0.00	0.00	0	0.00	52.47	249.39	1.00	249.39	1	49.00	0.00	0.00	1	1.50	47.50	3430.73	7.00
266	IL Experiment - Elderly	PL-Animal 7	PL-Animal 7-14	2019-07-16 17:02:08	3974.56	19.77	201.08	2.50	0.00	0	19.77	0	25.73	0	19.77	0	19.77	1197.15	8.10	147.80	2	2.37	2.50	0.00	0	0.00	19.77	0.00	0.00	0.00	0	19.77	0.00	0.00	0	0.00	19.77	707.30	2.50	282.92	1	22.23	0.00	0.00	0	0.00	19.77	1463.23	6.67
267	IL Experiment - Elderly	PL-Animal 7	PL-Animal 7-15	2019/7/14 12:50:36	2805.19	29.47	95.20	21.47	0.00	466	0.00	466	0.00	466	0.00	466	0.00	0.00	0.00	0.00	0	29.47	0.00	0.00	0	0.00	29.47	0.00	0.00	0.00	0	29.47	0.00	0.00	0	0.00	29.47	657.61	2.00	328.81	1	26.50	0.00	0.00	0	0.00	29.47	0.00	0.00
268	IL Experiment - Elderly	PL-Animal 7	PL-Animal 7-16	2019/7/14 18:22:34	5639.96	41.57	135.69	7.50	0.00	468	0.00	468	0.00	468	0.00	468	0.00	153.36	3.00	51.12	1	52.70	1.50	0.00	1	1.00	53.20	0.00	0.00	0.00	0	41.57	0.00	0.00	0	0.00	41.57	2020.47	13.63	148.20	6	3.90	3.00	0.00	1	5.00	7.47	750.99	5.00
269	IL Experiment - Elderly	PL-Animal 7	PL-Animal 7-17	2019/7/14 18:24:06	5417.67	34.20	158.41	7.00	0.00	458	0.00	458	0.00	458	0.00	458	0.00	0.00	0.00	0.00	0	34.20	0.00	0.00	0	0.00	34.20	0.00	0.00	0.00	0	34.20	0.00	0.00	0	0.00	34.20	1538.66	7.53	204.25	4	2.70	0.00	0.00	1	4.97	21.60	235.44	2.00
270	IL Experiment - Elderly	PL-Animal 7	PL-Animal 7-18	2019/7/14 18:25:20	6633.41	43.37	152.96	8.50	0.00	488	0.00	488	0.00	488	0.00	488	0.00	320.34	1.00	320.35	1	43.77	0.00	0.00	1	1.00	42.77	0.00	0.00	0.00	0	43.37	0.00	0.00	0	0.00	43.37	1565.78	11.30	138.57	4	12.77	2.50	0.00	1	1.00	37.27	0.00	0.00
[truncated: 68 more columns]
