# Supplementary material for: “Integrative learning” promotes learning but not memory in older rats
Source: PeerJ. 2023 Mar 29;11:e15101. doi: 10.7717/peerj.15101 (PMC10066688; doi:10.7717/peerj.15101)
Supplement: Supplemental Information 6 [file peerj-11-15101-s006.xlsx]

## Sheet: Learning stage (Session 8-12)
Session	IL-12 Mo									PL-12 Mo								IL-1 Mo											PL-1 Mo
8	4	1	2	2	1	7	0	10		5	7	25	4	13	4	10		0	0	0	1	0	0	0	3	0	0		0	2	3	2	6	6	4	1	6	5
9	6	1	0	3	1	3	0	1		14	5	13	7	0	10	0		1	0	1	0	2	0	0	1	0	0		2	1	9	2	0	1	1	2	1	3
10	11	0	1	10	1	5	1	3		29	2	10	23	0	1	0		0	0	2	1	1	0	0	0	0	0		0	2	1	1	0	0	3	4	5	4
11	9	0	0	4	1	0	0	3		11	6	12	2	0	6	9		0	0	1	1	0	0	0	0	0	0		0	1	0	0	0	0	1	0	1	1
12	5	0	1	10	0	3	1	2		12	4	17	6	0	2	0		0	0	0	0	0	0	0	0	0	0		0	1	0	0	1	0	0	0	1	3
Average	7	0.4	0.8	5.8	0.8	3.6	0.4	3.8		14.2	4.8	15.4	8.4	2.6	4.6	3.8		0.2	0	0.8	0.6	0.6	0	0	0.8	0	0		0.4	1.4	2.6	1	1.4	1.4	1.8	1.4	2.8	3.2

## Sheet: Memory retention test stage
Session	IL-12 Mo									PL-12 Mo								IL-1 Mo											PL-1 Mo
13	2	17	12	5	1	3	2	2		45	3	22	6	0	1	7		0	0	1	2	1	0	0	0	3	0		1	1	1	1	1	1	0	0	2	2
14	4	17	3	31	10	5	8	7		4	9	1	18	6	2	3		0	0	0	2	0	0	0	0	0	0		0	2	0	0	0	0	0	0	2	1
15	16	2	3	7	6	9	4	6		6	5	0	2	0	4	1		0	0	0	0	0	0	0	0	0	0		0	1	1	0	1	0	0	0	0	0
Average	7.33333	12	6	14.3333	5.66667	5.66667	4.66667	5		18.3333	5.66667	7.66667	8.66667	2	2.33333	3.66667		0	0	0.333333	1.33333	0.333333	0	0	0	1	0		0.333333	1.33333	0.666667	0.333333	0.666667	0.333333	0	0	1.33333	1

## Sheet: Gestalt Transfer Learning Stage
Session	IL-12 Mo									PL-12 Mo								IL-1 Mo											PL-1 Mo
16	13	6	29	29	13	9	8	29		29	12	10	47	13	12	9		6	21	16	9	2	2	6	11	29	2		6	22	16	9	2	3	31	10	40	5
17	5	9	22	12	37	3	9	32		2	9	3	12	8	2	5		4	1	1	2	2	0	1	1	1	1		2	17	1	12	1	7	4	0	4	6
18	10	11	1	3	14	8	1	37		6	3	0	8	15	15	7		0	1	1	1	1	0	0	0	0	1		3	4	1	1	0	0	1	1	0	2
Average	9.33333	8.66667	17.3333	14.6667	21.3333	6.66667	6	32.6667		12.3333	8	4.33333	22.3333	12	9.66667	7		3.33333	7.66667	6	4	1.66667	0.666667	2.33333	4	10	1.33333		3.66667	14.3333	6	7.33333	1	3.33333	12	3.66667	14.6667	4.33333

## Sheet: Summary
Phases of the experiment	IL-12 Mo									PL-12 Mo								IL-1 Mo											PL-1 Mo
Learning stage (Session 8-12)	7	0.4	0.8	5.8	0.8	3.6	0.4	3.8		14.2	4.8	15.4	8.4	2.6	4.6	3.8		0.2	0	0.8	0.6	0.6	0	0	0.8	0	0		0.4	1.4	2.6	1	1.4	1.4	1.8	1.4	2.8	3.2
Memory retention test stage	7.33333	12	6	14.3333	5.66667	5.66667	4.66667	5		18.3333	5.66667	7.66667	8.66667	2	2.33333	3.66667		0	0	0.333333	1.33333	0.333333	0	0	0	1	0		0.333333	1.33333	0.666667	0.333333	0.666667	0.333333	0	0	1.33333	1
Gestalt transfer learning stage	9.33333	8.66667	17.3333	14.6667	21.3333	6.66667	6	32.6667		12.3333	8	4.33333	22.3333	12	9.66667	7		3.33333	7.66667	6	4	1.66667	0.666667	2.33333	4	10	1.33333		3.66667	14.3333	6	7.33333	1	3.33333	12	3.66667	14.6667	4.33333
